# Supplementary material for: Environmentally friendly process design for furan-based long-chain diester production aiming for bio-based lubricants
Source: Royal Society of Chemistry journal article supplement (doi:10.1039/d4gc04191g), 2024-11-21
Supplement: d4gc04191g1.pdf [file d4gc04191g1.pdf]

Supplementary Information

**Environmentally Friendly Process Design for Furan-based Long-chain Diesters Production  
Aiming for Bio-based Lubricant**

**Hye Jin Lee<sup>a,1</sup>, Yoonjae Lee<sup>b,1</sup>, Eun-hyeok Yang<sup>a</sup>, Jiyun Yoo<sup>b</sup>, Seungjun Choi<sup>b</sup>, Soonho  
Hwangbo<sup>c</sup>, Young-Woong Suh<sup>d</sup>, Jayeon Beak<sup>a,\*</sup>, Jeehoon Han<sup>b,\*</sup>, Yong Jin Kim<sup>a,\*</sup>,**

<sup>a</sup> Low Carbon Transition R&D Department, Korea Institute of Industrial Technology, 89  
Yangdaegiro-gil, Ipjang-myeon, Seobuk-gu, Cheonan-si, Chungcheongnam-do 31056, Republic of  
Korea

<sup>b</sup> Department of Chemical Engineering, Pohang University of Science and Technology, Pohang,  
37673, Republic of Korea

<sup>c</sup> Department of Chemical Engineering, Gyeongsang National University 501, Jinjudae-ro, Jinju-si,  
Gyeongsangnam-do, 52828, Republic of Korea

<sup>d</sup> Department of Chemical Engineering, Hanyang University, 222 Wangsimni-ro, Seongdong-gu,  
Seoul 04763, Republic of Korea

\*Corresponding author. E-mail address: jbaek@kitech.re.kr (J. B.), hhan@postech.ac.kr (J. H),  
yjkim@kitech.re.kr (Y. J. K)

<sup>1</sup> These authors contributed equally: Hye Jin Lee and Yoonjae Lee.

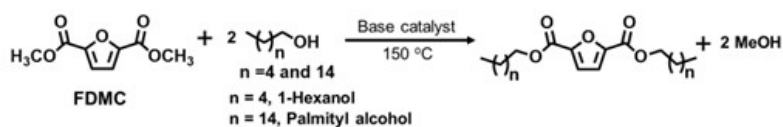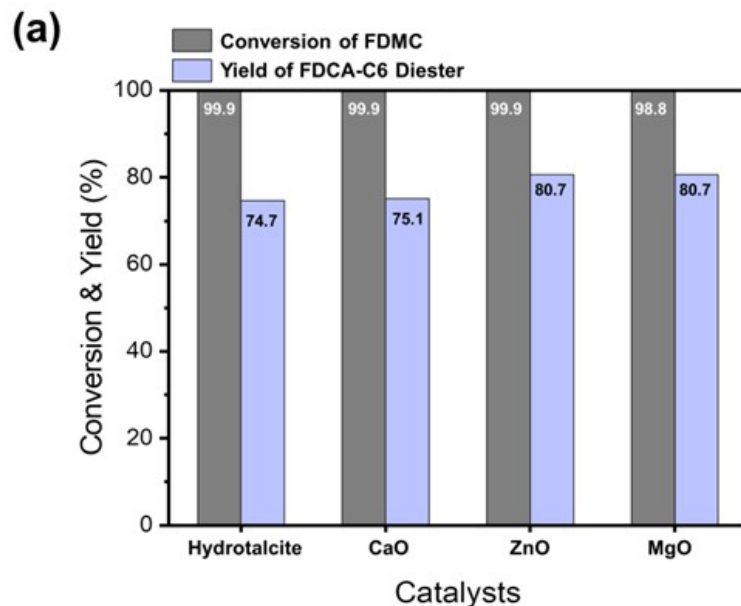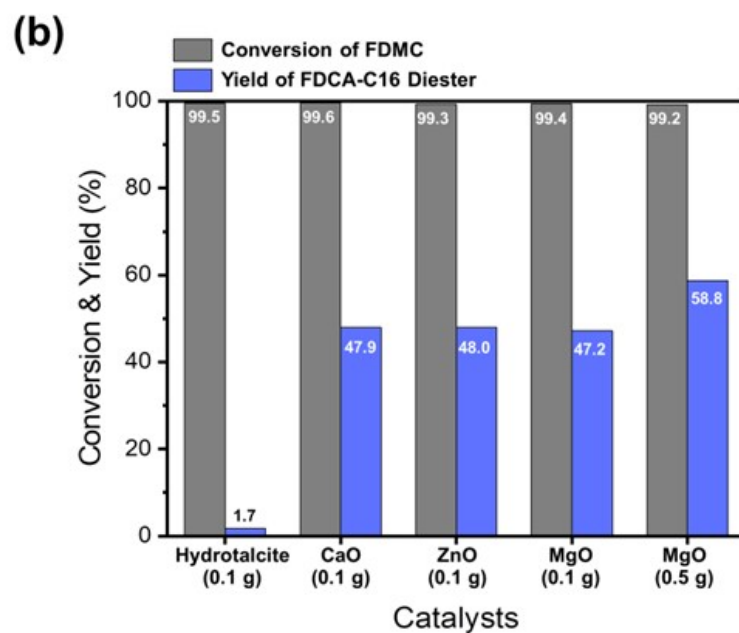

**Figure S1.** Transesterification of **FDMC** with (a) 1-hexanol (C6 alcohol) and (b) palmityl alcohol (C16 alcohol) over various base catalysts. Reaction conditions: FDMC (0.5 g, 2.7 mmol), alcohols (27 mmol), T = 150 °C, t = 20 h, catalyst amount (0.1 g), open reaction system.



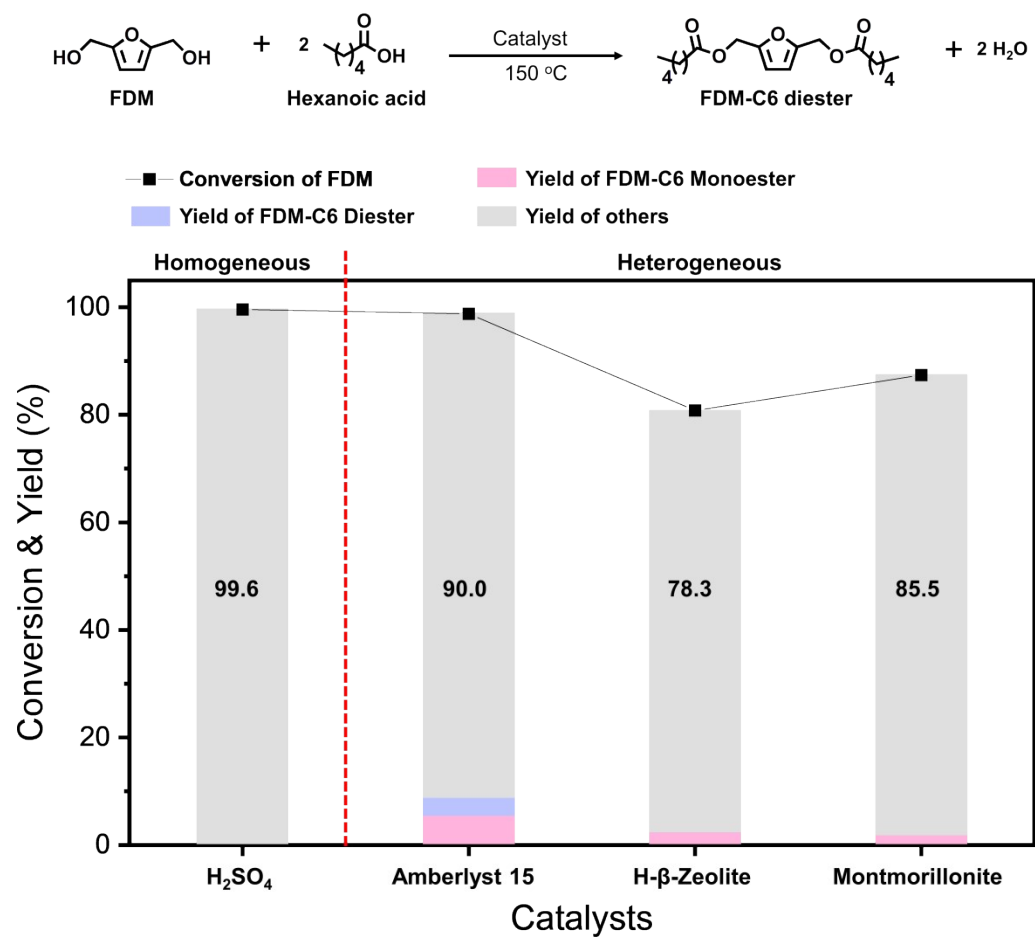

**Figure S3.** Esterification of **FDM** over various Brønsted catalysts. Reaction conditions: FDM (0.5 g, 3.9 mmol), hexanoic acid (39 mmol), Amberlyst-15 (0.1 g), cyclohexane (9 mL), T = 150 °C, t = 20 h, with the Dean-Stark apparatus.

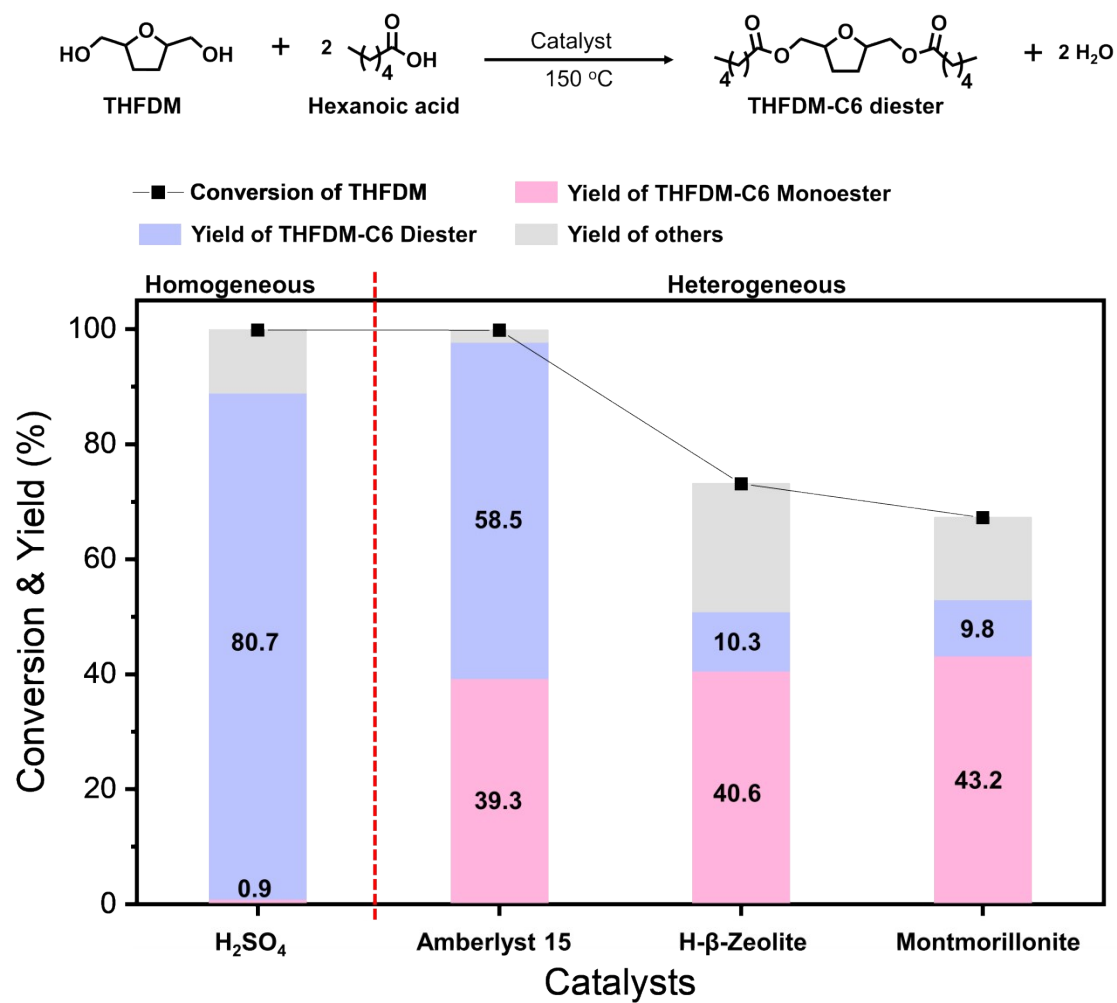

**Figure S4.** Esterification of **THFDM** with hexanoic acid (C6 fatty acid) over various acid catalysts. Reaction conditions: THFDM (0.5 g, 3.8 mmol), hexanoic acid (38 mmol), catalyst (0.1 g), cyclohexane (9 mL), T = 150 °C, t = 3 h, with the Dean-Stark apparatus.

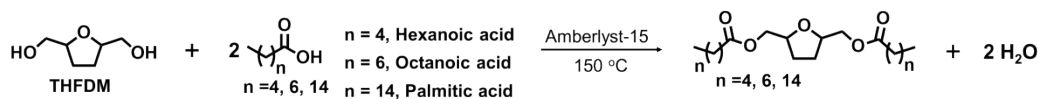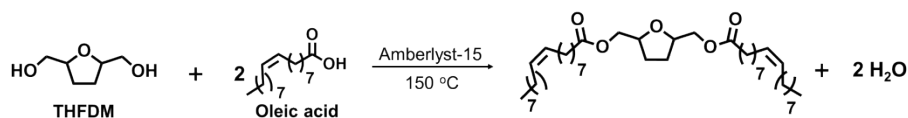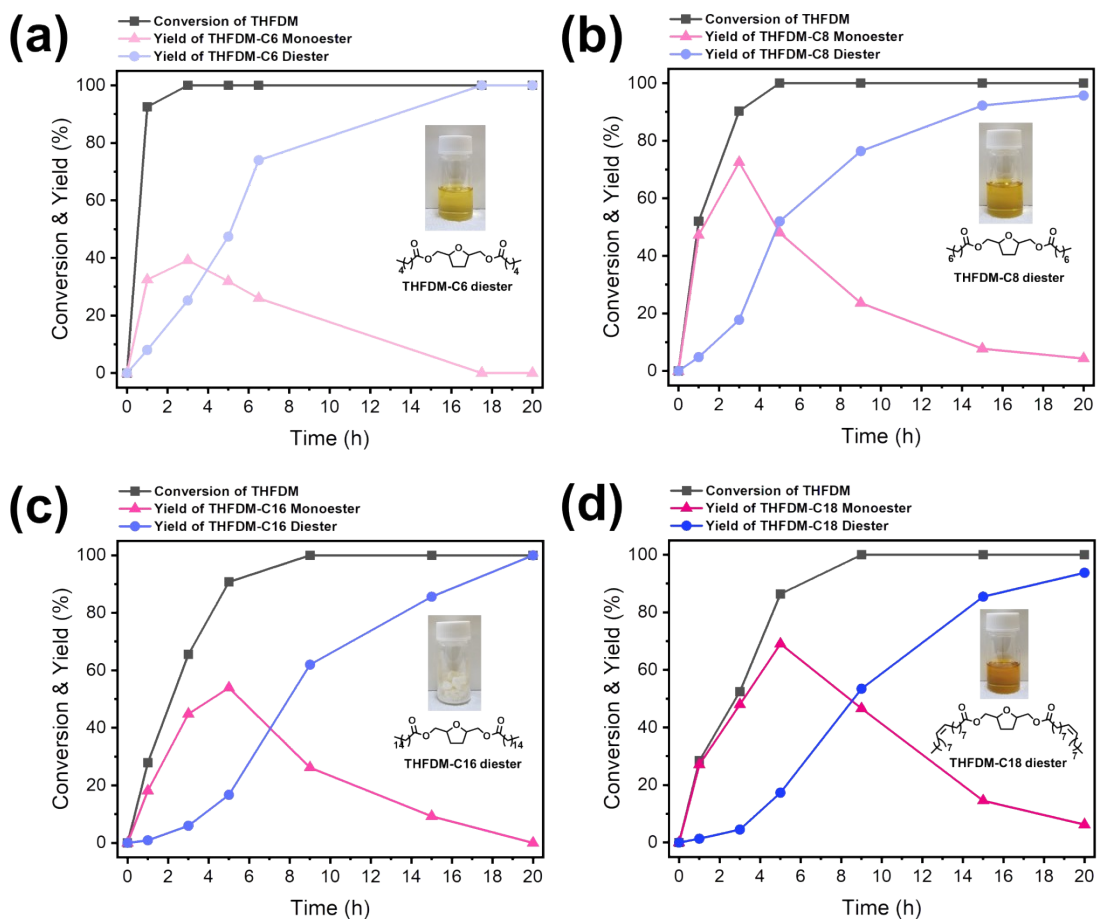

**Figure S5.** Effect of time in the esterification of **THFDM** with (a) hexanoic acid (C6 fatty acid), (b) octanoic acid (C8 fatty acid), (c) palmitic acid (C16 fatty acid), and (d) oleic acid (C18 fatty acid) over Amberlyst-15. Reaction conditions: THFDM (0.5 g, 3.8 mmol), fatty acids (38 mmol), Amberlyst 15 (0.1 g), cyclohexane (9 mL),  $T = 150^\circ\text{C}$ , with the Dean-Stark apparatus.

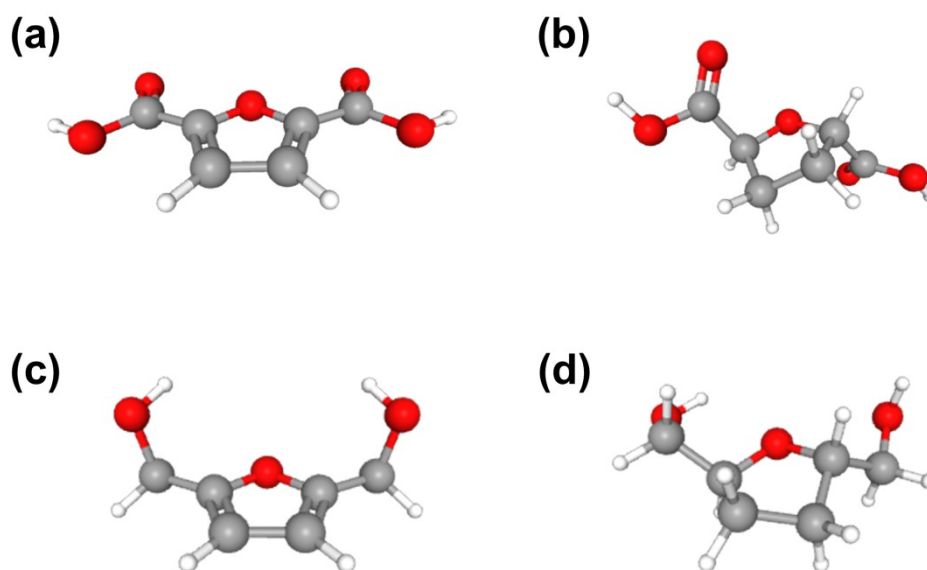

**Figure S6.** Molecular structure of furan compounds; (a) FDCA (b) THFDCA (c) FDM (d) THFDM

FDM and FDCA have double bonds in the furan ring, which means that the carbon atoms in the furan ring are planar structures due to their aromaticity. On the other hand, the carbon atoms in THFDM and THFDCA are single-bonded structures, causing distortion in the furan ring. S. P. Rao et al. reported that chemicals' melting points are related to molecular symmetry and size.<sup>1</sup> Based on this fact, the structural differences between furan and tetrahydrofuran affect melting points of furan compounds: FDCA (342 °C) > THFDCA (195–200 °C) > FDM (74–77 °C) > THFDM (-108.4 °C).

## Large-scale synthesis of furan diesters

### 1. Synthesis of FDCA diesters

In a typical procedure for the transesterification of FDMC with fatty alcohols, FDMC (126 g, 0.68 mol) and ZnO (25.2 g) were placed in a round-bottomed flask, and fatty alcohols (2.74 mol, 4 equiv. to FDMC) were added. The reactions were carried out in an open vessel system in the air atmosphere at 150 °C for 60 h.

For FDCA-C6 and FDCA-C8 diesters, the catalyst was removed by filtration after reaction. The final products were obtained by vacuum distillation to remove excess alcohols.

For FDCA-C16 diester, the catalyst was quickly removed by filtration before solidification. The FDCA-C16 diester was then separated by recrystallization in acetone.

For FDCA-C18 diester, the catalyst was removed by filtration after reaction. Methanol was added to the crude product, causing phase separation between the oleyl alcohol-methanol solution and the FDCA-C18 diester. To obtain pure FDCA-C18 diester, flash column chromatography using hexane/ethyl acetate (15/1) as eluent was conducted. The final product was obtained by evaporating the eluent.

### 2. Synthesis of THFDCA diesters

In a typical procedure for the esterification of THFDCA with fatty alcohols, THFDCA (110 g, 0.69 mol) and Amberlyst-15 (5 g) were placed in a round-bottomed flask, and fatty alcohols (2.75 mol, 4 equiv. to THFDCA) were added. Cyclohexane (100 ml) was then added to the reaction mixture as a reflux solvent. The Dean-Stark with a condenser was installed on top of the flask, and the esterifications were carried out at 150 °C for 48 h.

For THFDCA-C6 and THFDCA-C8 diesters, the catalyst was removed by filtration after reaction. The final products were obtained by vacuum distillation to remove excess alcohols.

For THFDCA-C16 diester, the catalyst was quickly removed by filtration before solidification. The THFDCA-C16 diester was then separated by recrystallization in acetone.

For THFDCA-C18 diester, the catalyst was removed by filtration after reaction. To obtain pure THFDCA-C18 diester, flash column chromatography using hexane/ethyl acetate (4/1) as eluent was



conducted. The final product was obtained by evaporating the eluent.

### 3. Synthesis of FDM diesters

Acyl chlorides (fatty acid chlorides) were used for the large-scale synthesis of FDM diesters. In a typical procedure, FDM (30 g, 0.23 mol) was added to dry  $\text{CH}_2\text{Cl}_2$  (700 mL). Triethylamine (69 mL, 4 equiv. to FDM), N,N'-dimethylaminopyridine (0.98 g), and fatty acid chlorides (0.7 mol, 3 equiv. to FDM) were then added dropwise to prevent explosive reactions. After the substrates were completely converted to diesters at room temperature over 15 h, unreacted fatty acid chlorides were hydrolyzed to fatty acids by addition of water.

For FDM-C6, FDM-C8, and FDM-C18 diesters, the separated organic layer was washed with 2 M  $\text{Na}_2\text{CO}_3$  solution to eliminate fatty acids which were transformed into their sodium salts. After washing the products with D.I. water 3 times, the final products were obtained after evaporating  $\text{CH}_2\text{Cl}_2$ .

For FDM-C16 diester, all solvents in crude product were removed by vacuum evaporation. Water (600 mL) and hexane (600 mL) were then added to the resulting solution. The organic layer was separated using a separatory funnel, and the hexane was removed by evaporation. The FDM-C16 diester was finally purified by recrystallization in ethanol.

### 4. Synthesis of THFDM diesters

In a typical procedure for the esterification of THFDM with fatty acids, THFDM (110 g, 0.83 mol) and Amberlyst-15 (5 g) were placed in a round-bottomed flask, and fatty acids (2.49 mol, 3 equiv. to THFDM) were added. Cyclohexane (100 mL) was then added to the reaction mixture as a reflux solvent. The Dean-Stark with condenser was installed on top of the flask, and the esterifications were carried out at 150 °C for 48 h.

For THFDM-C6, THFDM-C8, and THFDM-C18 diesters, after removing the catalyst by filtration, ethyl acetate (500 mL) was added to the mixture to extract organic components. The fatty acids were removed by transforming it into its sodium salts by washing with 2 M  $\text{Na}_2\text{CO}_3$  solution. After washing the products with D.I. water 3 times, the final products were obtained after evaporating ethyl acetate.

For THFDM-C16 diester, the catalyst was quickly removed by filtration before solidification. The THFDM-C16 diester was purified by recrystallization in ethanol.

(a)

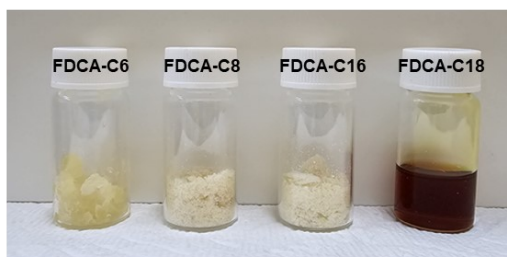

(b)

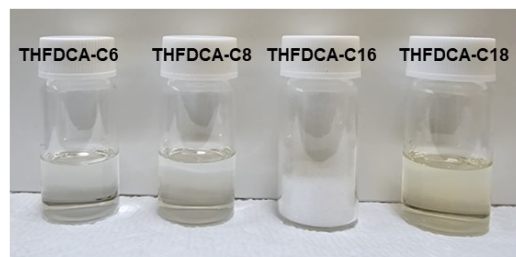

(c)

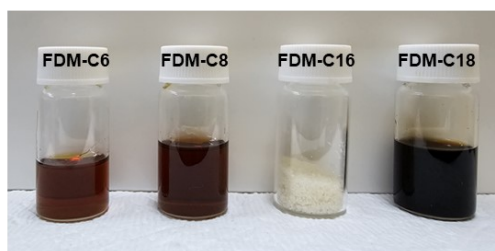

(d)

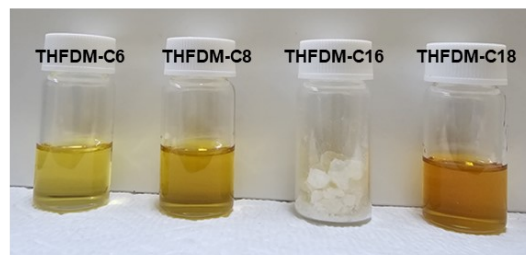

**Figure S7.** Pictures of synthesized furan diesters: (a) FDCA-based diesters, (b) THFDCA-based diesters, (c) FDM-based diesters, and (d) THFDM-based diesters.

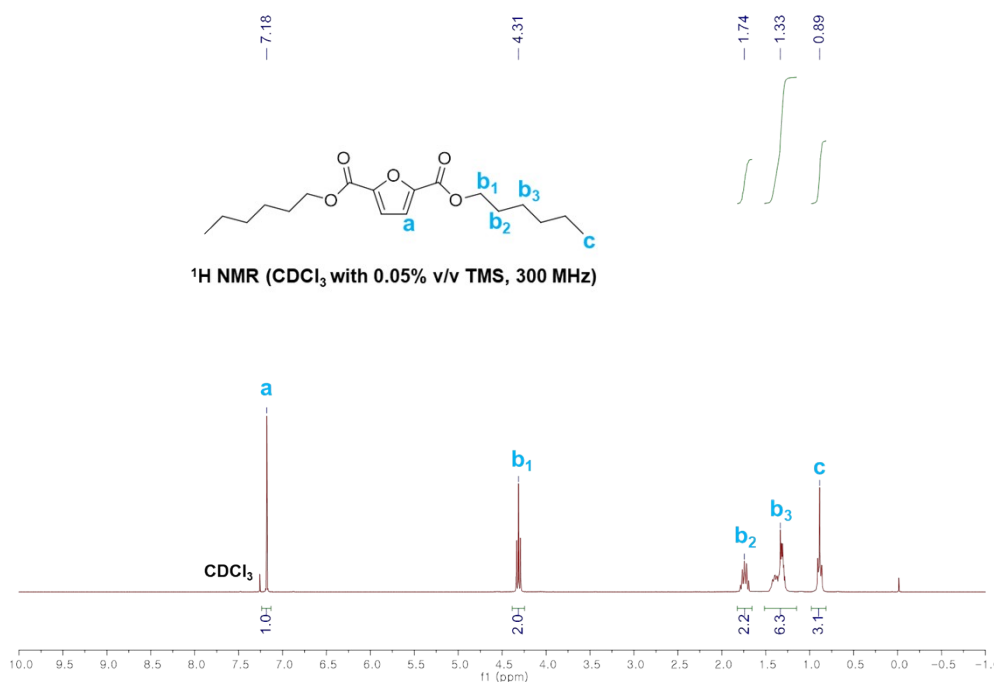

**Figure S8.** <sup>1</sup>H NMR spectrum (300 MHz, CDCl<sub>3</sub>) of purified **FDCA-C6** diester.

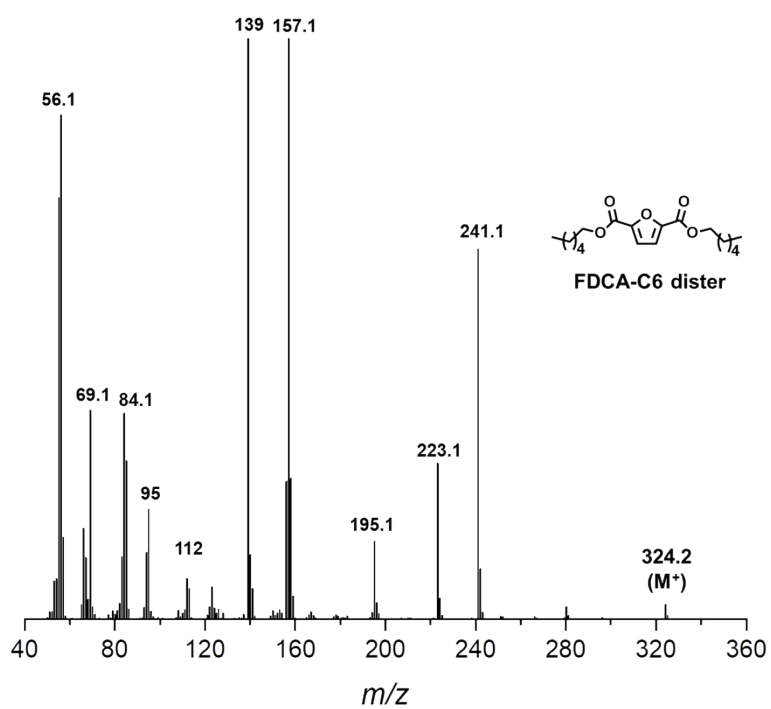

**Figure S9.** GC-MS total ion chromatogram (TIC) of purified **FDCA-C6** diester.

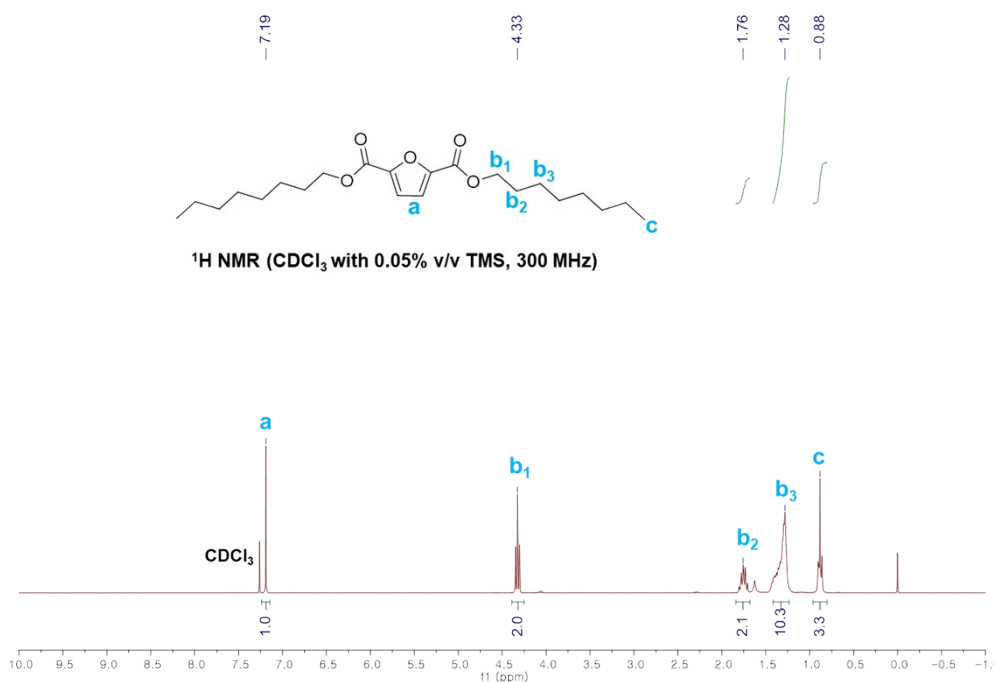

**Figure S10.** <sup>1</sup>H NMR spectrum (300 MHz, CDCl<sub>3</sub>) of purified **FDCA-C8** diester.

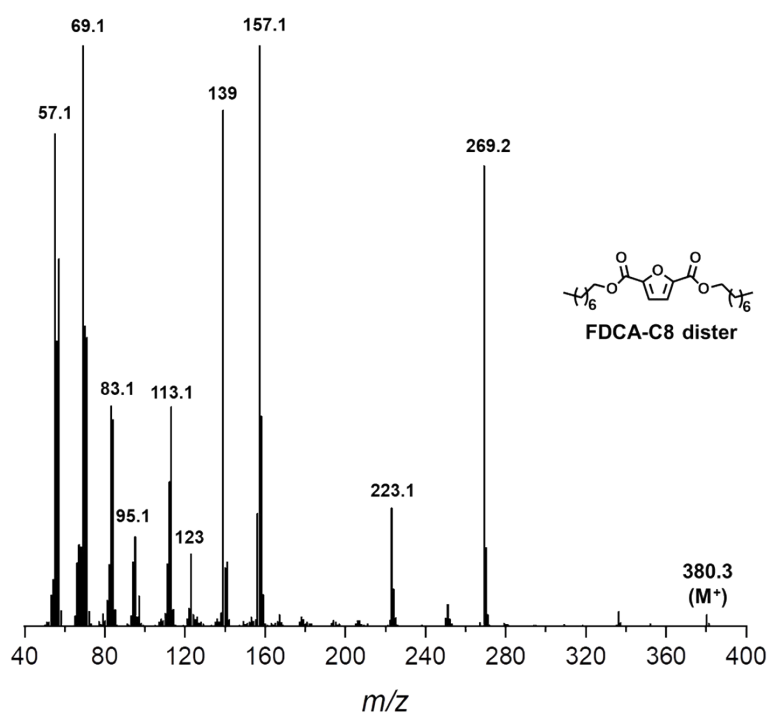

**Figure S11.** GC-MS total ion chromatogram (TIC) of purified **FDCA-C8** diester.

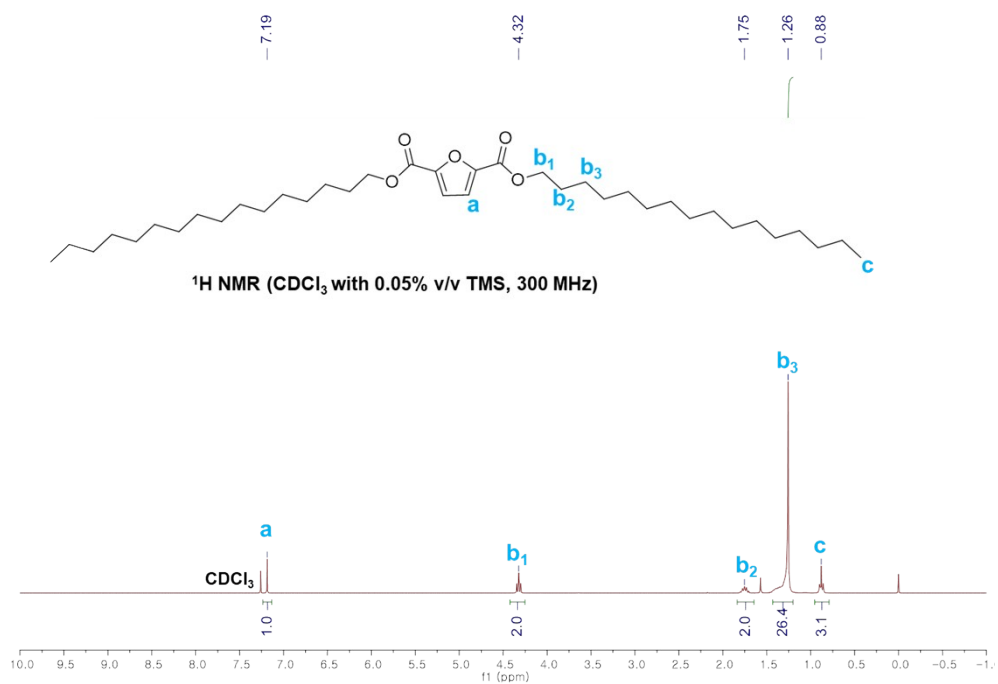

**Figure 12.**  $^1\text{H}$  NMR spectrum (300 MHz,  $\text{CDCl}_3$ ) of purified **FDCA-C16** diester.

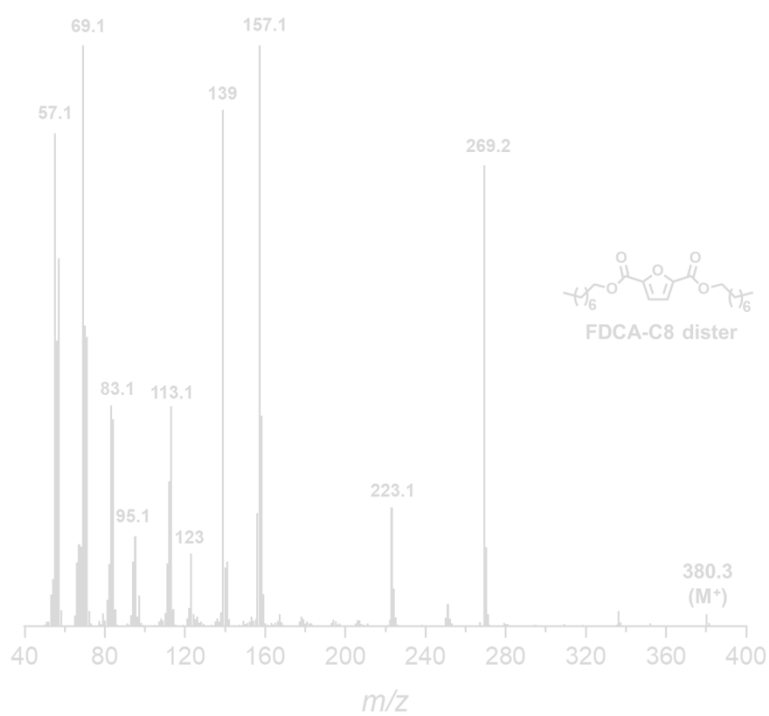

**Figure S13.** GC-MS total ion chromatogram (TIC) of purified **FDCA-C16** diester.

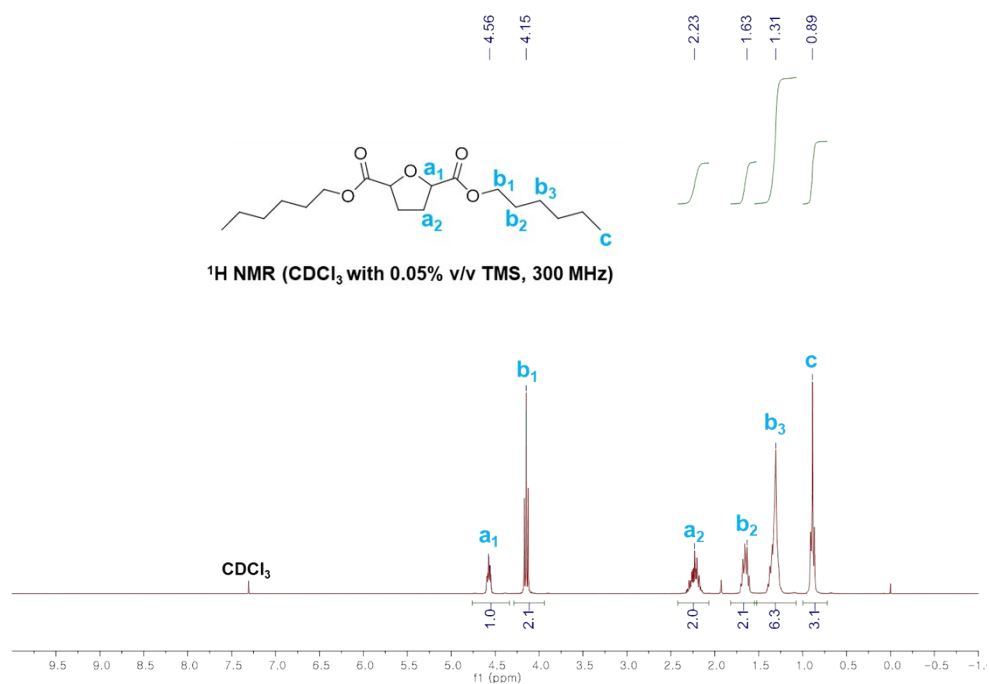

**Figure S14.** <sup>1</sup>H NMR spectrum (300 MHz, CDCl<sub>3</sub>) of purified **THFDCA-C6** diester.

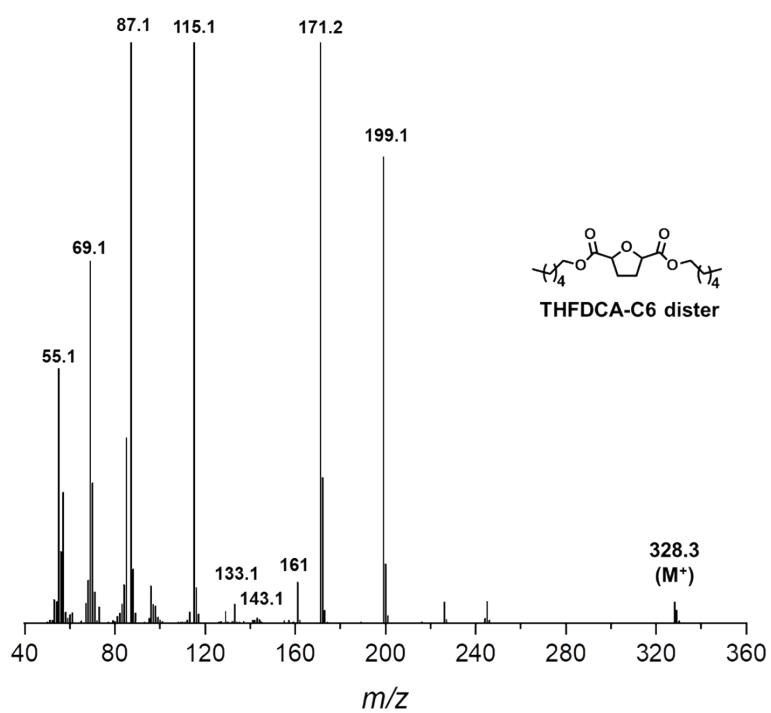

**Figure S15.** GC-MS total ion chromatogram (TIC) of purified **THFDCA-C6** diester.

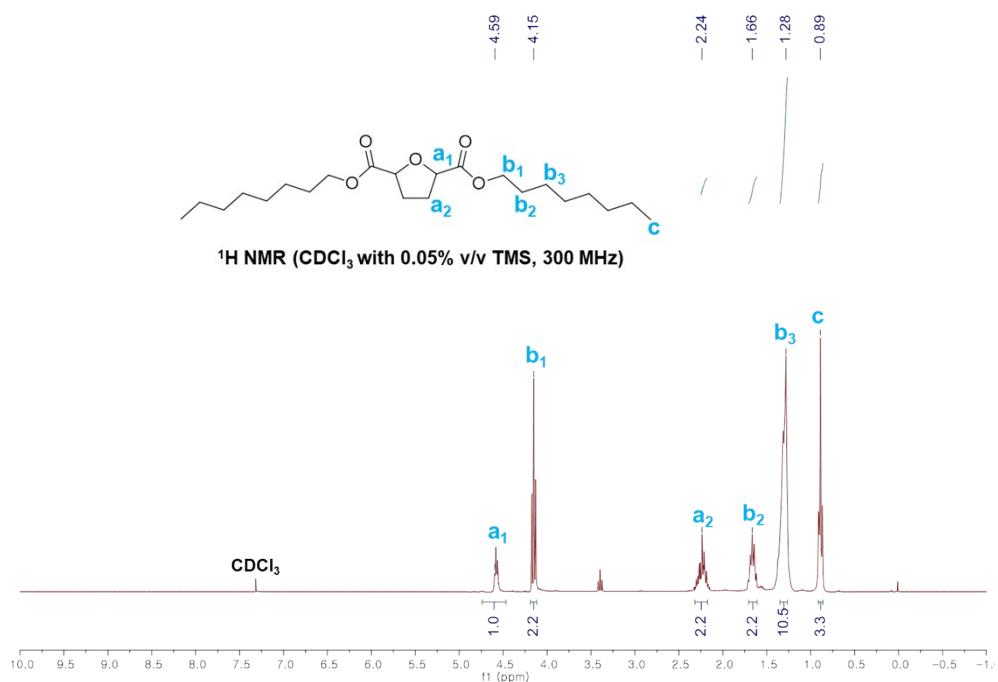

**Figure S16.** <sup>1</sup>H NMR spectrum (300 MHz, CDCl<sub>3</sub>) of purified **THFDCA-C8** diester.

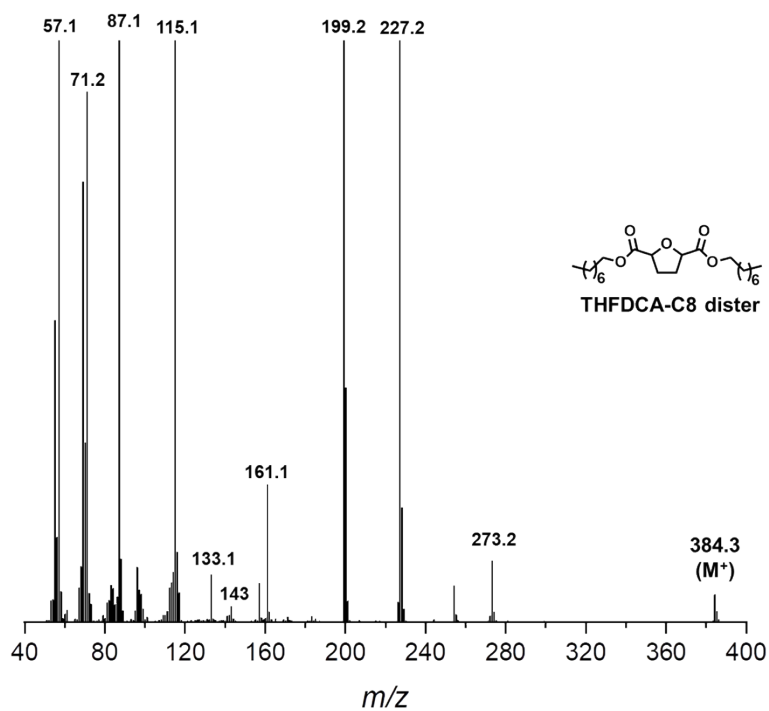

**Figure S17.** GC-MS total ion chromatogram (TIC) of purified **THFDCA-C8** diester.

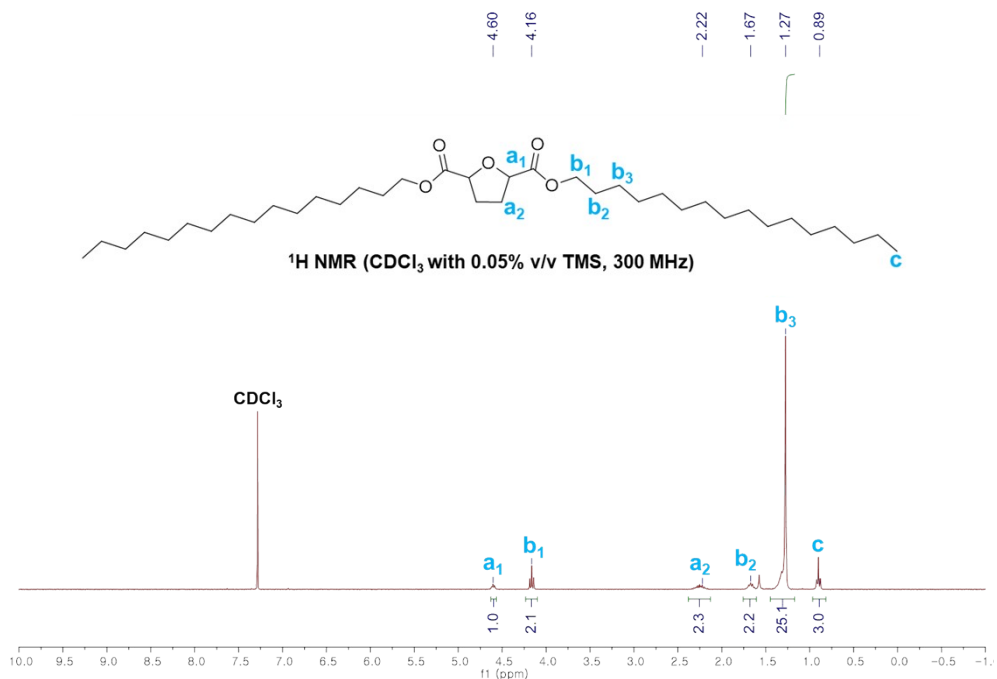

**Figure S18.** <sup>1</sup>H NMR spectrum (300 MHz, CDCl<sub>3</sub>) of purified **THFDCA-C16** diester.

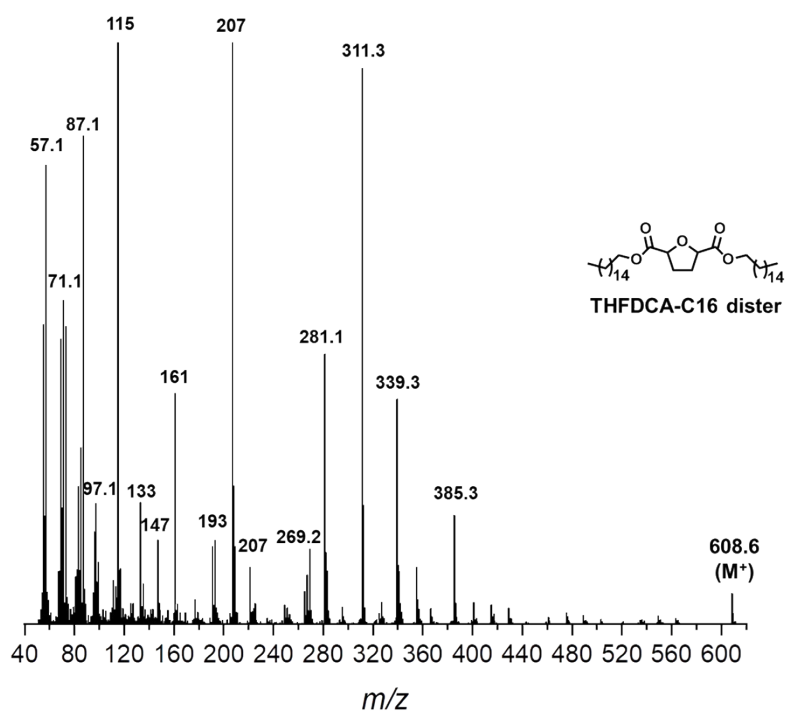

**Figure S19.** GC-MS total ion chromatogram (TIC) of purified **THFDCA-C16** diester.



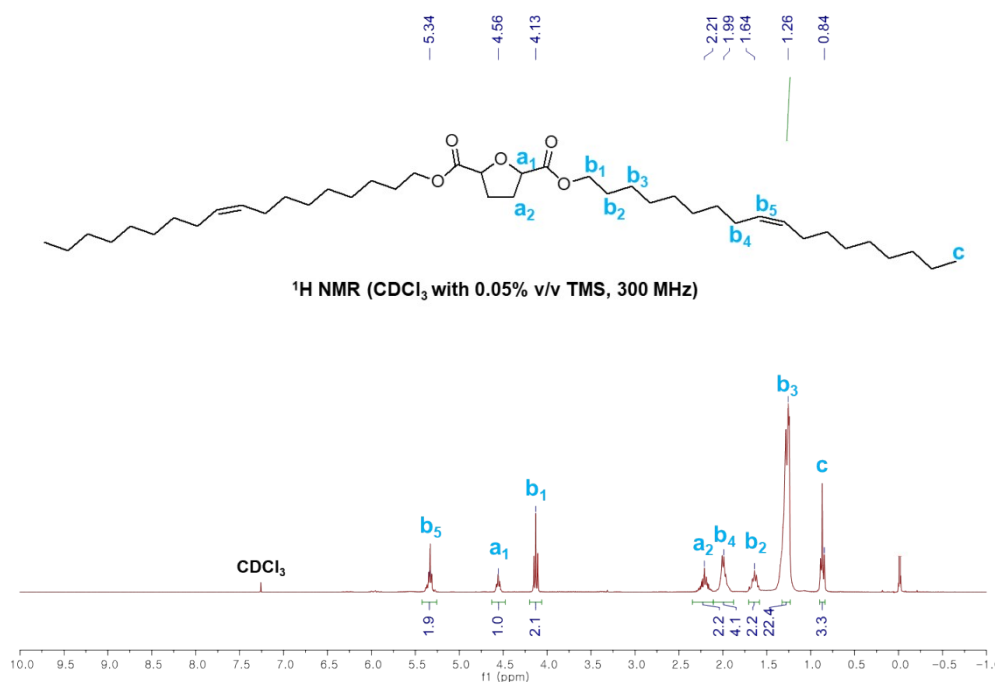

**Figure S20.** <sup>1</sup>H NMR spectrum (300 MHz, CDCl<sub>3</sub>) of purified THFDCA-C18 diester.

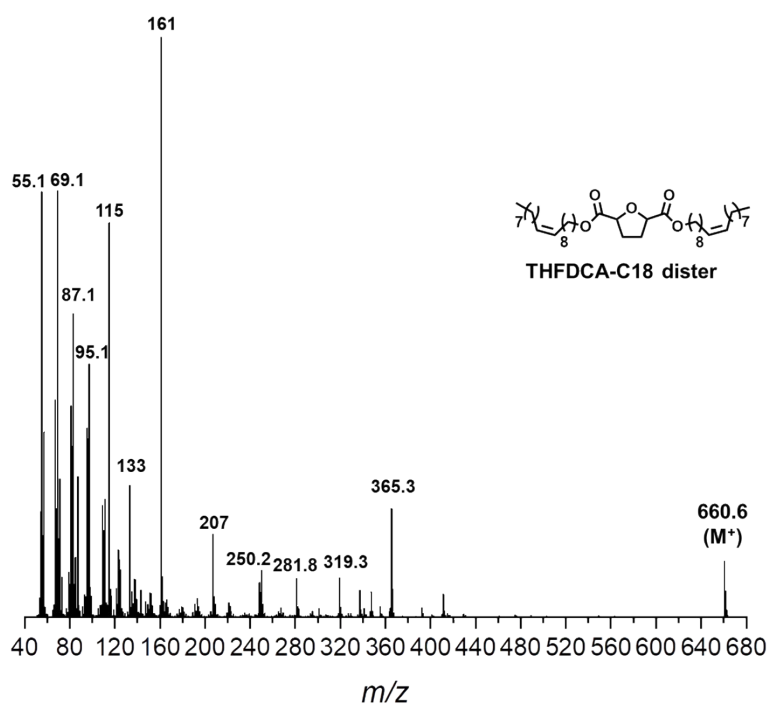

**Figure S21.** GC-MS total ion chromatogram (TIC) of purified THFDCA-C18 diester.

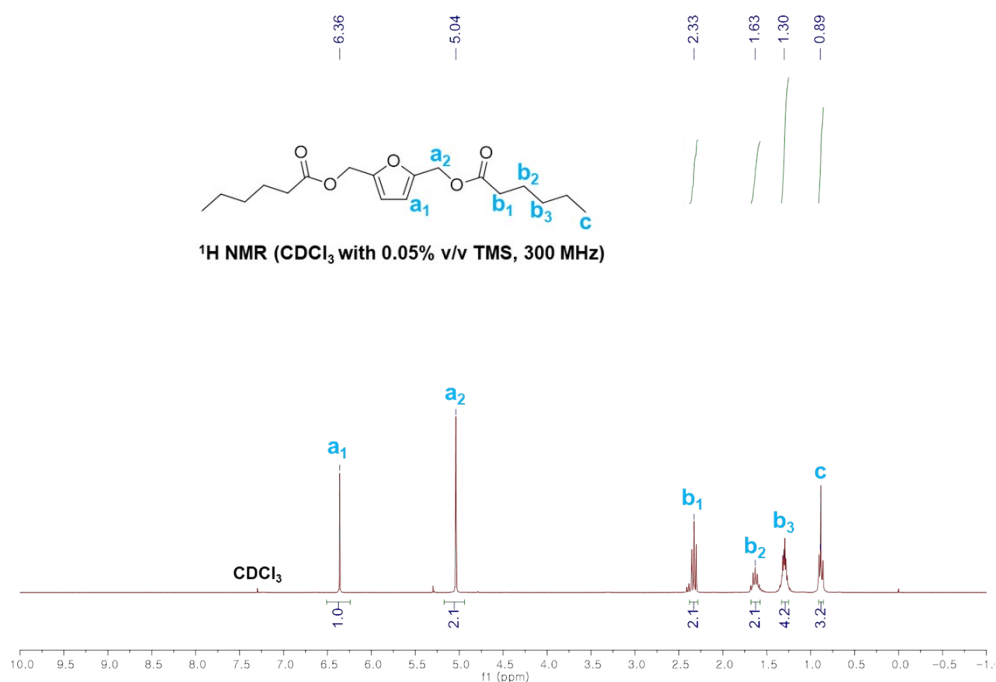

**Figure S22.** <sup>1</sup>H NMR spectrum (300 MHz, CDCl<sub>3</sub>) of purified **FDM-C6** diester.

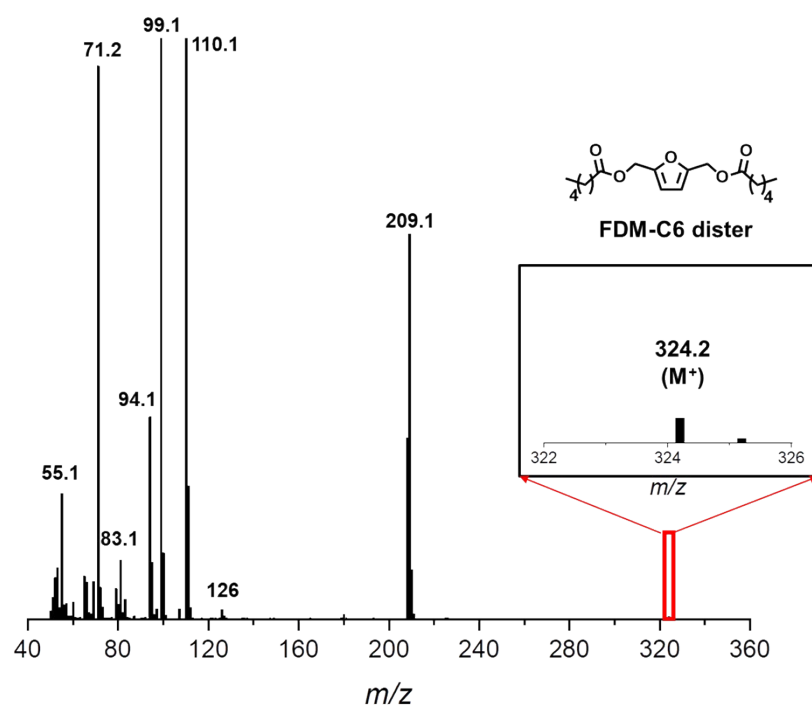

**Figure S23.** GC-MS total ion chromatogram (TIC) of purified **FDM-C6** diester.

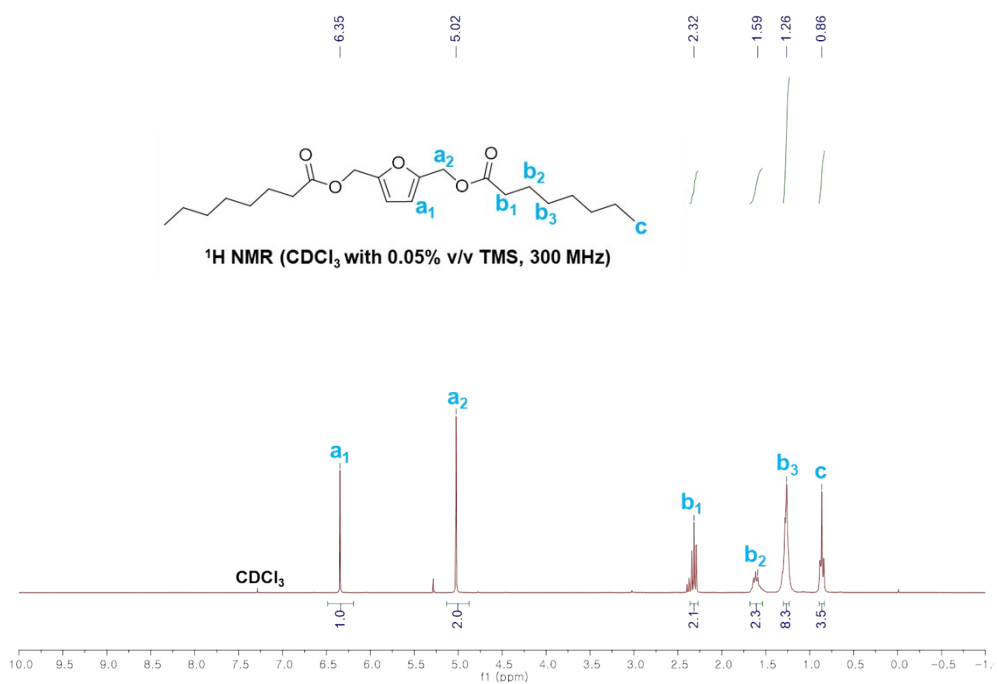

**Figure S24.** <sup>1</sup>H NMR spectrum (300 MHz, CDCl<sub>3</sub>) of purified **FDM-C8** diester.

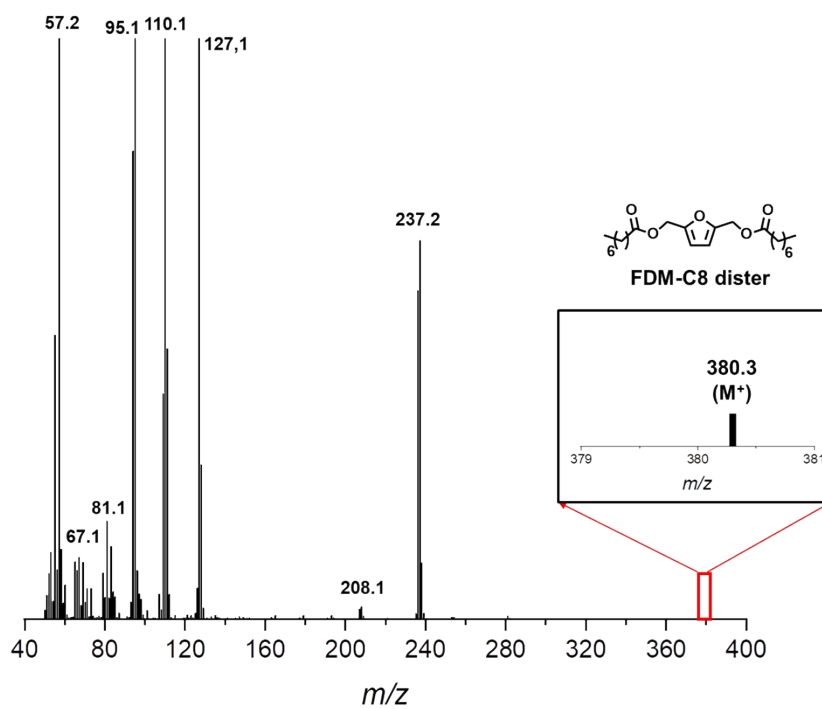

**Figure S25.** GC-MS total ion chromatogram (TIC) of purified **FDM-C8** diester.

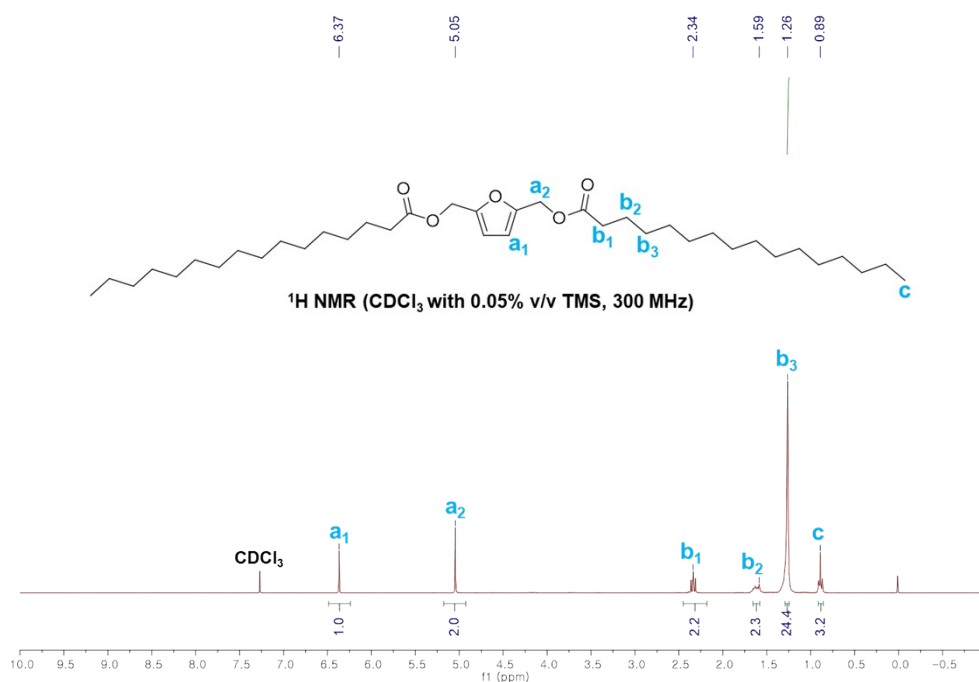

**Figure S26.** <sup>1</sup>H NMR spectrum (300 MHz, CDCl<sub>3</sub>) of purified **FDM-C16** diester.

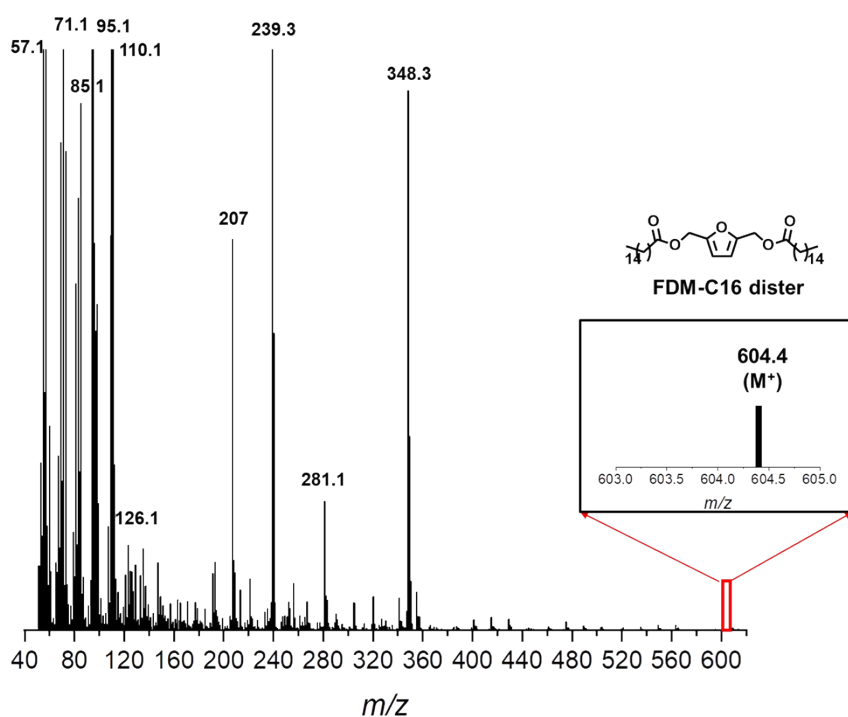

**Figure S27.** GC-MS total ion chromatogram (TIC) of purified **FDCA-C16** diester.

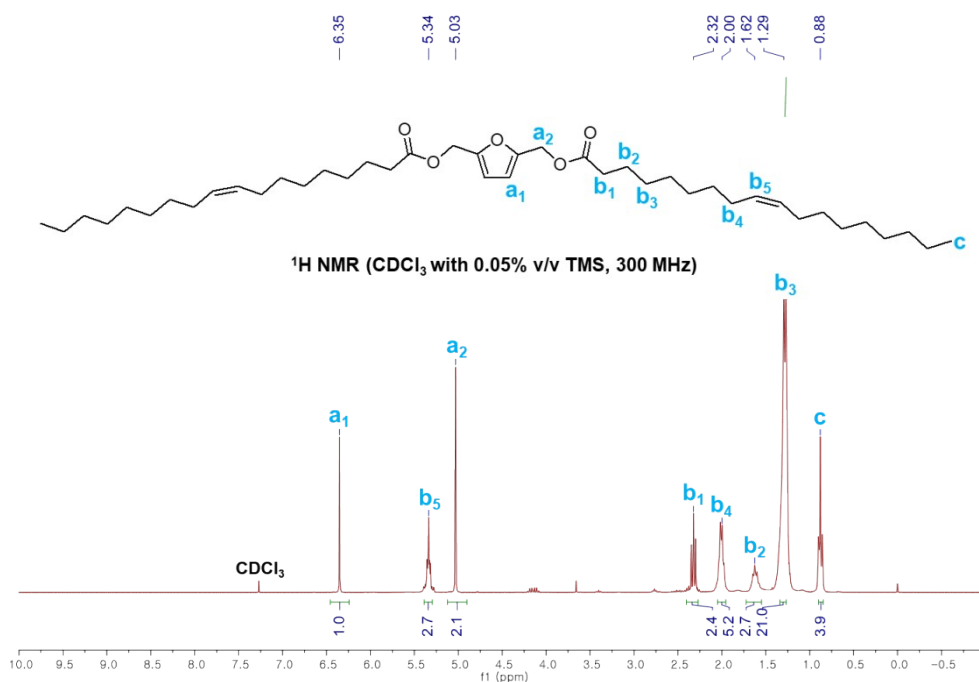

**Figure S28.** <sup>1</sup>H NMR spectrum (300 MHz, CDCl<sub>3</sub>) of purified **FDM-C18** diester.

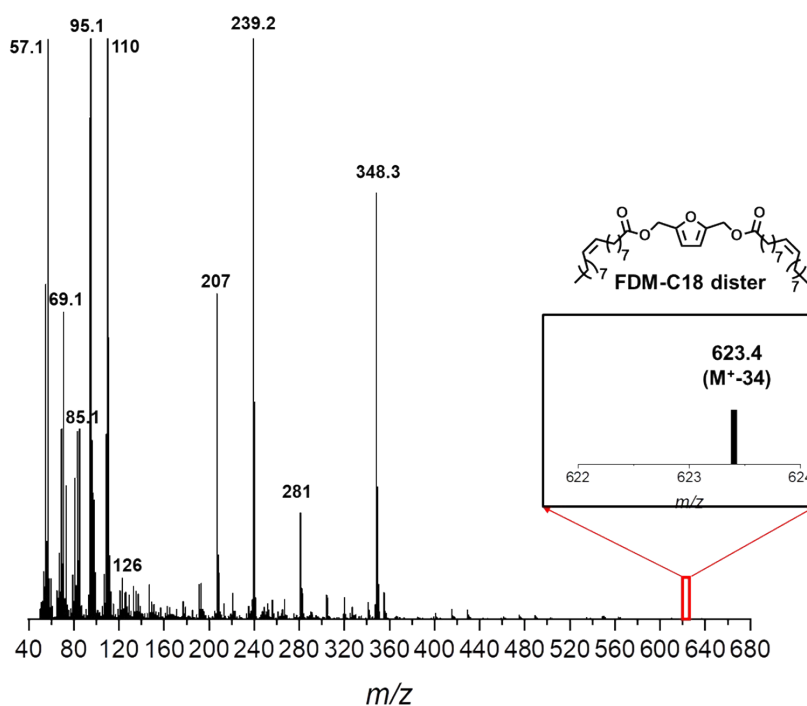

**Figure S29.** GC-MS total ion chromatogram (TIC) of purified **FDM-C18** diester.

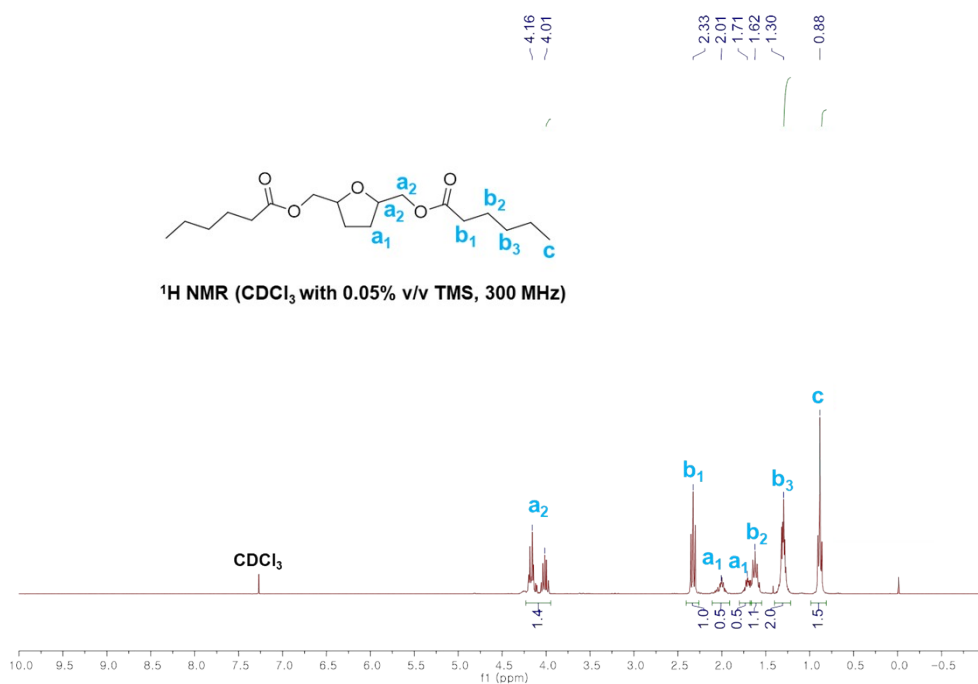

**Figure S30.** <sup>1</sup>H NMR spectrum (300 MHz, CDCl<sub>3</sub>) of purified **THFDM-C6** diester.

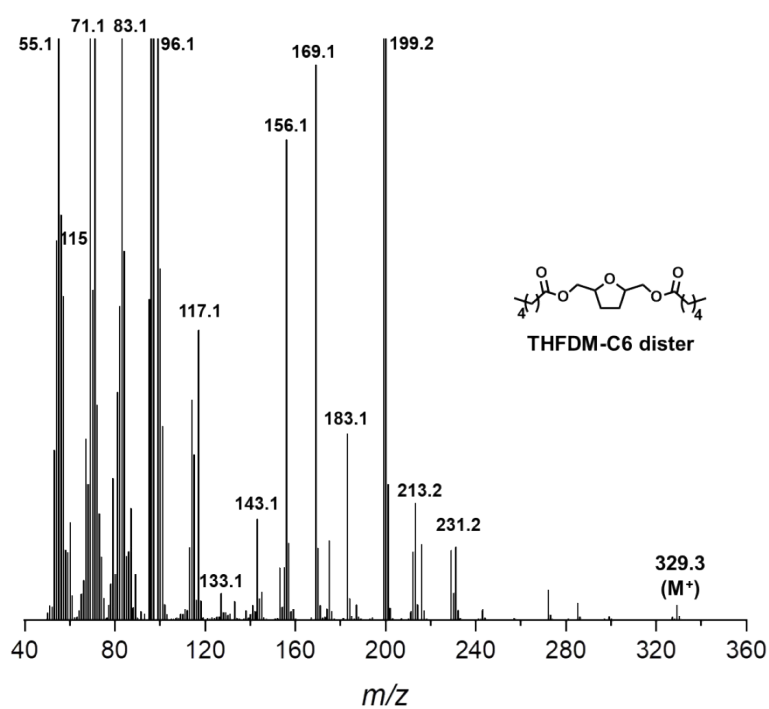

**Figure S31.** GC-MS total ion chromatogram (TIC) of purified **THFDM-C6** diester.

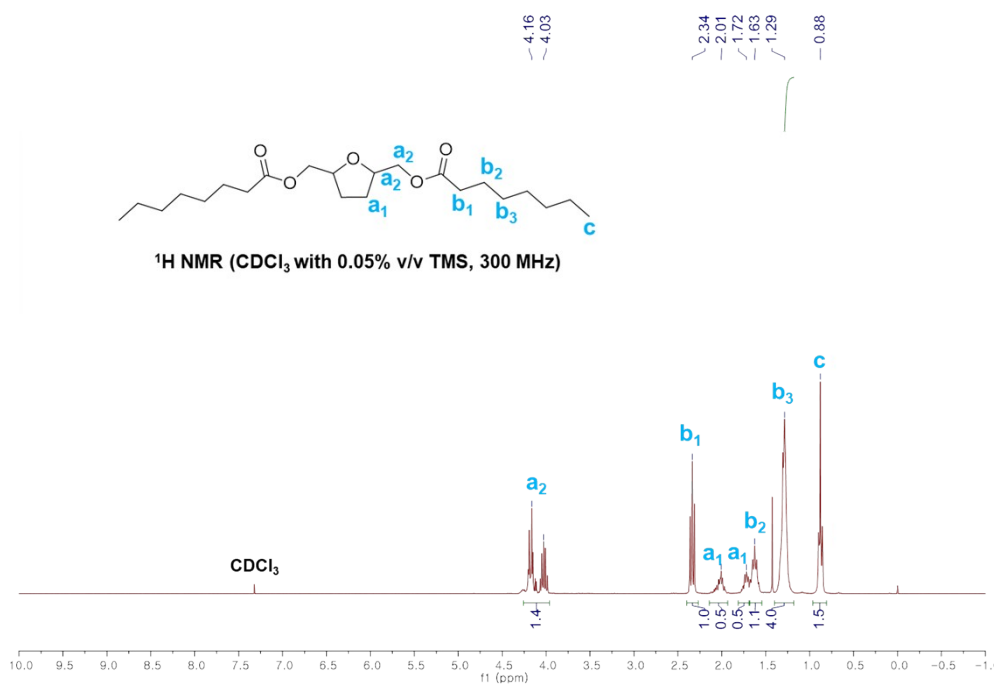

**Figure S32.** <sup>1</sup>H NMR spectrum (300 MHz, CDCl<sub>3</sub>) of purified **THFDM-C8** diester.

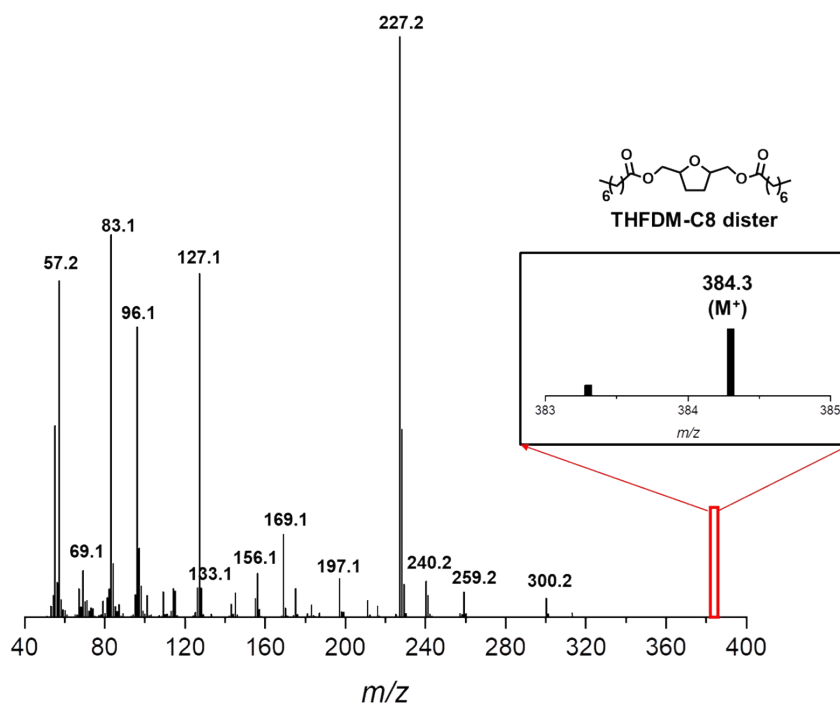

**Figure S33.** GC-MS total ion chromatogram (TIC) of purified **THFDM-C8** diester.

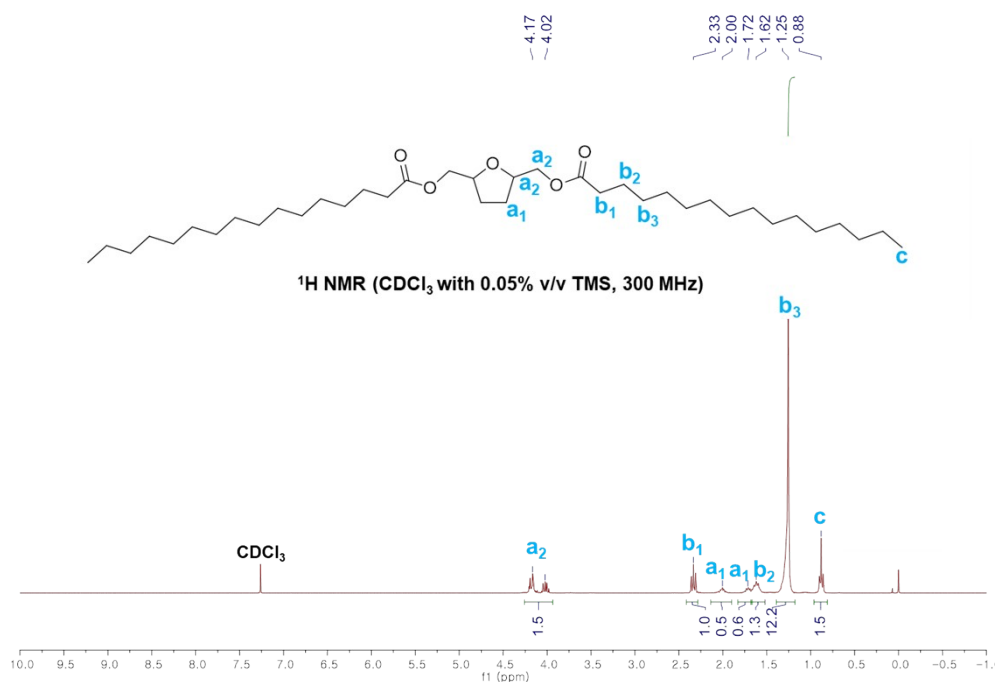

**Figure S34.** <sup>1</sup>H NMR spectrum (300 MHz, CDCl<sub>3</sub>) of purified **THFDM-C16** diester.

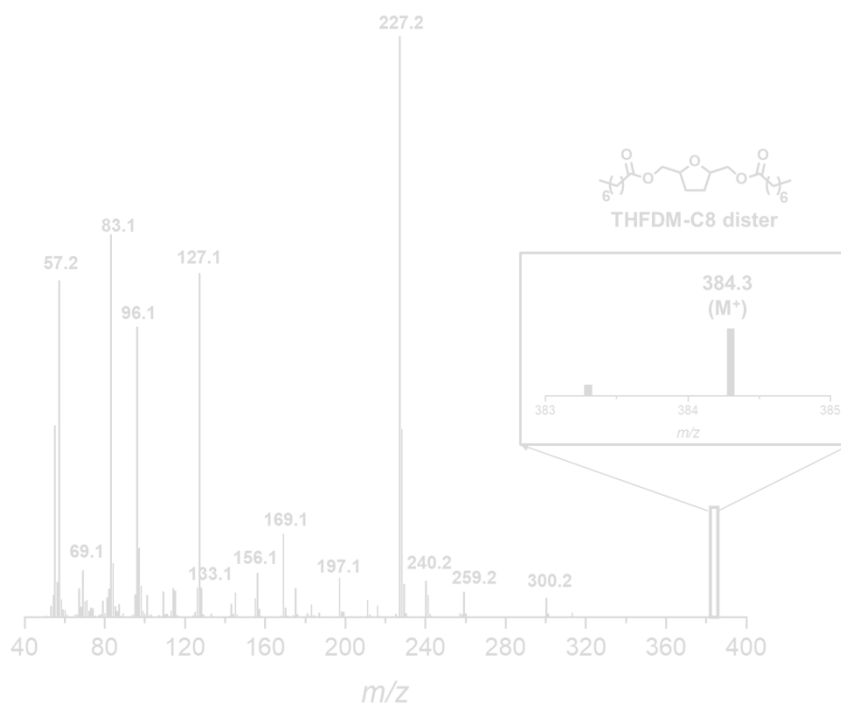

**Figure S35.** GC-MS total ion chromatogram (TIC) of purified **THFDM-C16** diester.



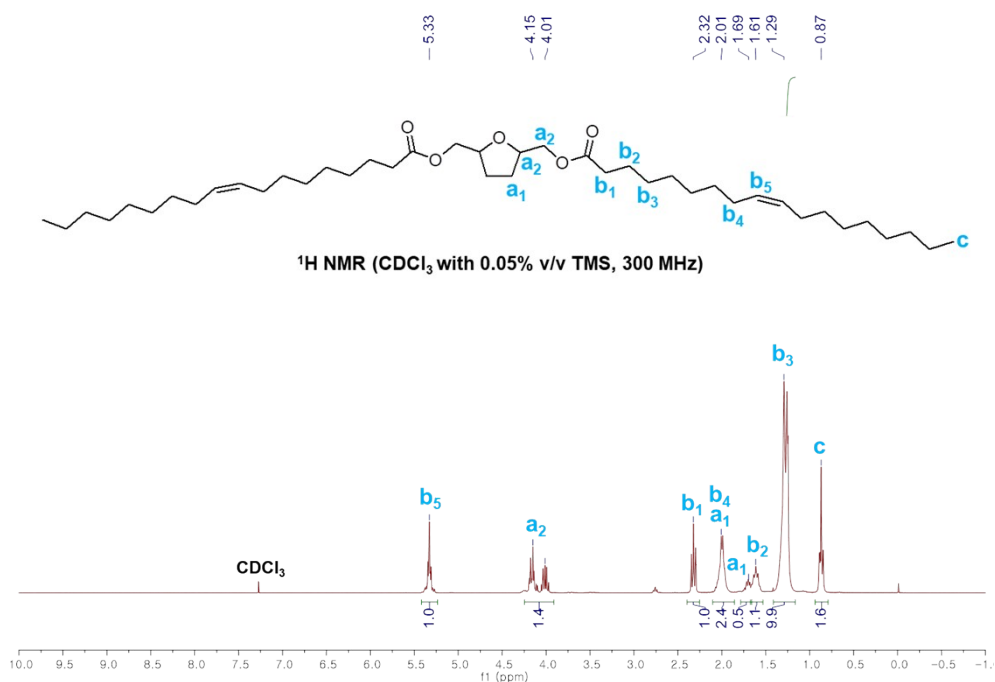

**Figure S36.** <sup>1</sup>H NMR spectrum (300 MHz, CDCl<sub>3</sub>) of purified **THFDM-C18** diester.

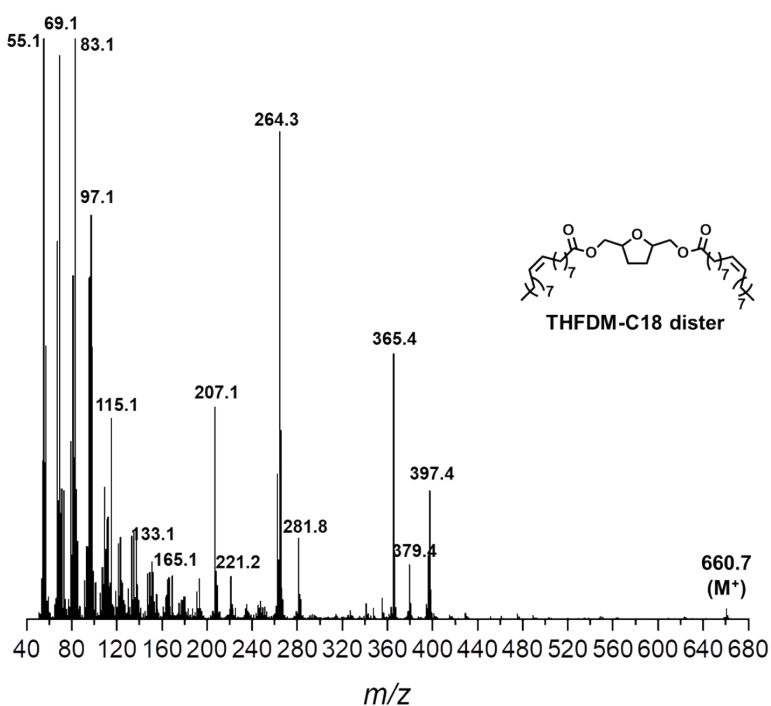

**Figure S37.** GC-MS total ion chromatogram (TIC) of purified **THFDM-C18** diester.

**Table S1.** Physical properties of the commercial lubricants

| Products                                            | KV (mm <sup>2</sup> s <sup>-1</sup> ) |                   | VI   | Pour point<br>(°C) | Flashpoint<br>(°C) |
|-----------------------------------------------------|---------------------------------------|-------------------|------|--------------------|--------------------|
|                                                     | KV <sub>40</sub>                      | KV <sub>100</sub> |      |                    |                    |
| PAO2                                                | 5.2-8.8                               | 1.7-2.8           | -    | <-50               | >145               |
| Combustion Engine Oil<br>(SEA20) for Land Transport | -                                     | 5.6-9.3           | >96  | <-22.5             | >80                |
| Combustion Engine Oil<br>(SAE20) for Land Transport | -                                     | 5.6-9.3           | >75  | <-12.5             | >180               |
| Combustion Engine Oil<br>(SAE20) for Ship           | -                                     | 5.6-9.3           | >75  | <-12.5             | >190               |
| Machine Oil (ISO VG32)                              | 28.8-35.2                             | -                 | -    | <-5                | >150               |
| Gear Oil (ISO VG32)                                 | 28.8-35.2                             | -                 | >90  | <-10               | >170               |
| Gear Oil (SAE 80W)                                  | -                                     | >7.0              | >85  | <-20               | >175               |
| Turbine Oil (ISO VG32)                              | 28.8-35.2                             | >4.2              | -    | <-7.5              | >180               |
| Bearing Oil (ISO VG10)                              | 9.0-11.0                              | -                 | >80  | <-5                | >130               |
| Bearing Oil (ISO VG32)                              | 28.8-35.2                             | -                 | >90  | <-5                | >150               |
| Auto Transmission Fluid                             | -                                     | >5.5              | >120 | <-40               | >170               |
| Compressor Oil (VBL 32)                             | 28.8-35.2                             | -                 | -    | <9.0               | >175               |
| Working Fluid                                       | 28.8-35.2                             | -                 | >90  | <-22.5             | >170               |
| Working Fluid (For Train)                           | -                                     | 6-8               | >95  | <-25               | >210               |
| Heat Transfer Oil (ISO VG10)                        | 9.0-11.0                              | -                 | -    | <-10               | >130               |
| Heat Transfer Oil (ISO VG32)                        | 28.8-35.2                             | -                 | -    | <-7.5              | >150               |
| Cutting Oil (hydrophobic)                           | >10                                   | -                 | -    | <-5                | >130               |
| Insulating Oil                                      | <13                                   | <4                | -    | <-27.5             | >140               |
| Corrosion Preventive Oil<br>(KP-20-1)               | >10                                   | -                 | -    | <-25.0             | >115               |

**Table S2.** Detailed process simulation result data for HMF hydrogenation and THFDM purification.

|                          | 1     | 2    | 3     | 4     | 5     | 6     | 7     | 8     | 9     | 10    | 11    | 12    |
|--------------------------|-------|------|-------|-------|-------|-------|-------|-------|-------|-------|-------|-------|
| Temp.<br>[°C]            | 25    | 25   | 159.4 | 125.5 | 125.5 | 133.7 | 183.3 | 265.0 | 125.0 | 126.9 | 308.3 | 270.6 |
| Pressure<br>[bar]        | 1     | 1    | 41.4  | 1     | 1     | 1     | 1     | 1     | 1     | 41.4  | 1     | 1     |
| H <sub>2</sub><br>[kg/h] | 0     | 33.6 | 33.6  | 0     | 0     | 0     | 0     | 0     | 0     | 0     | 0     | 0     |
| MEG<br>[kg/h]            | 2571  | 0    | 36677 | 36677 | 30345 | 1517  | 121.4 | 7.8   | 2567  | 34106 | 0     | 3.9   |
| 5-HMF<br>[kg/h]          | 733.5 | 0    | 733.5 | 0     | 0     | 0     | 0     | 0     | 0     | 0     | 0     | 0     |
| Humins<br>[kg/h]         | 0     | 0    | 0.1   | 32.4  | 32.4  | 32.3  | 32.3  | 32.3  | 0     | 0.1   | 28.7  | 3.5   |
| THFDM<br>[kg/h]          | 0     | 0    | 18.6  | 753.5 | 752.6 | 749.7 | 748.3 | 740.9 | 1.4   | 18.6  | 0.3   | 733.2 |

**Table S3.** Detailed process simulation result data for THFDM esterification and THFDM-C18 diester purification.

|                               | 13     | 14     | 15     | 16     | 17     | 18     | 19     | 20     | 21     | 22     | 23     |
|-------------------------------|--------|--------|--------|--------|--------|--------|--------|--------|--------|--------|--------|
| Temp.<br>[°C]                 | 25     | 149.9  | 149.9  | 149.9  | 386.3  | 406.6  | 442.7  | 475.8  | 95.7   | 357.4  | 518.7  |
| Pressure<br>[bar]             | 1      | 1      | 1      | 1      | 1      | 1      | 1      | 1      | 1      | 1      | 1      |
| THFDM<br>[kg/h]               | 733.2  | 738.1  | 8.1    | 8.0    | 5.0    | 0      | 0      | 0      | 3.2    | 5.0    | 0      |
| Oleic acid<br>[kg/h]          | 3017.8 | 4750.8 | 1770.7 | 1768.6 | 1768.6 | 1042.6 | 394.0  | 186.4  | 2.2    | 1733.0 | 35.6   |
| Cyclohexane<br>[kg/h]         | 1045.4 | 1045.4 | 1045.4 | 140.9  | 0.1    | 0      | 0      | 0      | 1045.4 | 0.1    | 0      |
| H <sub>2</sub> O<br>[kg/h]    | 0      | 0      | 190.1  | 27.0   | 0      | 0      | 0      | 0      | 190.1  | 0      | 0      |
| MO-C18 <sup>a</sup><br>[kg/h] | 0      | 33.2   | 230.4  | 230.4  | 230.4  | 228.1  | 223.5  | 219.0  | 0      | 33.2   | 197.1  |
| DI-C18 <sup>b</sup><br>[kg/h] | 0      | 0      | 3322.9 | 3322.9 | 3322.9 | 3322.9 | 3322.9 | 3322.9 | 0      | 0      | 3322.9 |

<sup>a</sup>THFDM-C18 monoester, <sup>b</sup>THFDM-C18 diester

**Table S4.** Temperature and enthalpy values for HMF hydrogenation and THFDM purification by each heater/cooler.

| <b>Block</b>  |      | <b>Inlet T (°C)</b> | <b>Outlet T (°C)</b> | <b>Enthalpy (MW)</b> |
|---------------|------|---------------------|----------------------|----------------------|
| H1(Heater)    | Heat | 115.43              | 159.85               | 1.047                |
| D1(Reboiler)  | Heat | 133.17              | 133.67               | 7.73                 |
| D2(Reboiler)  | Heat | 182.75              | 183.25               | 1.72                 |
| D3(Reboiler)  | Heat | 264.47              | 264.97               | 0.54                 |
| D4(Reboiler)  | Heat | 307.80              | 308.30               | 0.13                 |
| D5(Reboiler)  | Heat | 270.11              | 270.61               | 0.02                 |
| H3(Heater)    | Cool | 125.02              | 124.70               | 0.86                 |
| R1(Reactor)   | Cool | 160.35              | 159.85               | 0.42                 |
| D1(Condenser) | Cool | 125.51              | 125.01               | 7.73                 |
| D2(Condenser) | Cool | 125.53              | 125.03               | 1.70                 |
| D3(Condenser) | Cool | 126.74              | 126.24               | 0.50                 |
| D4(Condenser) | Cool | 264.16              | 263.66               | 0.13                 |
| D5(Condenser) | Cool | 150.96              | 150.46               | 0.02                 |

**Table S5.** Temperature and enthalpy values for THFDM esterification and THFDM-C18 diester purification by each heater/cooler.

| <b>Block</b>   |      | <b>Inlet T (°C)</b> | <b>Outlet T (°C)</b> | <b>Enthalpy (MW)</b> |
|----------------|------|---------------------|----------------------|----------------------|
| H2(Heater)     | Heat | 132.15              | 149.85               | 0.10                 |
| R2(Heater)     | Heat | 149.35              | 149.85               | 1.70                 |
| D6(Reboiler)   | Heat | 385.79              | 386.29               | 0.95                 |
| D7(Reboiler)   | Heat | 406.09              | 406.59               | 0.61                 |
| D8(Reboiler)   | Heat | 442.19              | 442.69               | 0.58                 |
| D9(Reboiler)   | Heat | 475.35              | 475.85               | 0.35                 |
| D10(Reboiler)  | Heat | 518.21              | 518.71               | 0.40                 |
| D6(Condenser)  | Cool | 90.62               | 90.12                | 0.10                 |
| D7(Condenser)  | Cool | 351.70              | 351.20               | 0.56                 |
| D8(Condenser)  | Cool | 362.20              | 361.70               | 0.50                 |
| D9(Condenser)  | Cool | 362.57              | 362.07               | 0.27                 |
| D10(Condenser) | Cool | 365.57              | 365.07               | 0.29                 |

**Table S6.** Temperature and heat capacity values of energy utility streams

| Utility Stream |      | Inlet T<br>(°C) | Outlet T<br>(°C) | C <sub>p</sub> (KJ/kg/°C) |
|----------------|------|-----------------|------------------|---------------------------|
| LLP Steam      | Heat | 147.6           | 146.6            | 2121.2                    |
| LP Steam       | Heat | 185.5           | 184.5            | 1994.3                    |
| MP Steam       | Heat | 237.5           | 236.5            | 1777.4                    |
| HP Steam       | Heat | 386.0           | 385.0            | 1686.9                    |
| Mineral Oil    | Heat | 600.0           | 599.0            | 206.0                     |
| Cooling Water  | Cool | 25              | 35               | 4.3                       |

**Table S7.** Project cost worksheet including total direct cost and total capital investment for THFDM production and THFDM-C18 production.

| Capital cost estimation               |       |          | Installed costs      |
|---------------------------------------|-------|----------|----------------------|
| THFDM production                      |       |          | \$36,850,400         |
| THFDM-C18 diester production          |       |          | \$16,929,000         |
| Heat and power generation             |       |          | \$16,926,220         |
| HEN                                   |       |          | \$1,387,037          |
| Storage                               |       |          | \$949,410            |
| <b>Total Installed cost</b>           |       |          | <b>\$73,042,067</b>  |
| Warehouse                             | 4.0%  | of *ISBL | \$2,151,176          |
| Site development                      | 9.0%  | of *ISBL | \$4,840,146          |
| Additional piping                     | 4.5%  | of *ISBL | \$2,420,073          |
| <b>Total direct cost (TDC)</b>        |       |          | <b>\$82,453,462</b>  |
| Prorateable expenses                  | 10.0% | of TDC   | \$8,245,346          |
| Field expenses                        | 10.0% | of TDC   | \$8,245,346          |
| Home office & construction fee        | 20.0% | of TDC   | \$16,490,692         |
| Project contingency                   | 10.0% | of TDC   | \$8,245,346          |
| Other costs (Start-Up, Permits, etc.) | 10.0% | of TDC   | \$8,245,346          |
| <b>Total indirect cost</b>            |       |          | <b>\$49,472,077</b>  |
| <b>Fixed capital investment (FCI)</b> |       |          | <b>\$131,925,539</b> |
| Land                                  | 1.5%  | of TCI   | \$2,109,469          |
| Working capital                       | 5.0%  | of FCI   | \$6,596,277          |
| <b>Total capital investment (TCI)</b> |       |          | <b>\$140,631,285</b> |

\*Inside-battery-limits (ISBL) equipment costs include THFDM production and THFDM-C18 diester production.

**Table S8.** Discounted cashflow sheet of THFDM production and THFDM-C18 diester production (part 1)

| Year                     | -2        | -1         | 0          | 1           | 2           | 3           | 4           | 5           | 6           | 7           | 8           |
|--------------------------|-----------|------------|------------|-------------|-------------|-------------|-------------|-------------|-------------|-------------|-------------|
| Capital Investment       | 4,221,617 | 31,662,129 | 16,886,469 |             |             |             |             |             |             |             |             |
| Land                     | 2,109,469 |            |            |             |             |             |             |             |             |             |             |
| Working Capital          |           |            | 6,596,277  |             |             |             |             |             |             |             |             |
| Loan payment             |           |            |            | 11,796,477  | 11,796,477  | 11,796,477  | 11,796,477  | 11,796,477  | 11,796,477  | 11,796,477  | 11,796,477  |
| Loan interest payment    | 506,594   | 4,306,050  | 6,332,426  | 6,332,426   | 5,895,302   | 5,423,208   | 4,913,346   | 4,362,696   | 3,767,993   | 3,125,714   | 2,432,053   |
| Loan principal           | 6,332,426 | 53,825,620 | 79,155,323 | 73,691,272  | 67,790,096  | 61,416,826  | 54,533,695  | 47,099,913  | 39,071,429  | 30,400,666  | 21,036,242  |
| THFDM-C18 diester        |           |            |            | 128,639,909 | 147,017,039 | 147,017,039 | 147,017,039 | 147,017,039 | 147,017,039 | 147,017,039 | 147,017,039 |
| Excess electricity       |           |            |            | 1,353,106   | 1,546,407   | 1,546,407   | 1,546,407   | 1,546,407   | 1,546,407   | 1,546,407   | 1,546,407   |
| Total Annual Sales       |           |            |            | 129,993,015 | 148,563,446 | 148,563,446 | 148,563,446 | 148,563,446 | 148,563,446 | 148,563,446 | 148,563,446 |
| Feed cost                |           |            |            | 31,089,924  | 35,531,342  | 35,531,342  | 35,531,342  | 35,531,342  | 35,531,342  | 35,531,342  | 35,531,342  |
| Variable Operating Costs |           |            |            | 71,178,082  | 75,923,287  | 75,923,287  | 75,923,287  | 75,923,287  | 75,923,287  | 75,923,287  | 75,923,287  |
| Fixed Operating Costs    |           |            |            | 6,052,859   | 6,052,859   | 6,052,859   | 6,052,859   | 6,052,859   | 6,052,859   | 6,052,859   | 6,052,859   |
| Total Product Cost       |           |            |            | 108,320,864 | 117,507,488 | 117,507,488 | 117,507,488 | 117,507,488 | 117,507,488 | 117,507,488 | 117,507,488 |
| Annual Depreciation      |           |            |            |             |             |             |             |             |             |             |             |
| General Plant            |           |            |            |             |             |             |             |             |             |             |             |
| MACRS method (7yr)       |           |            |            | 14.29%      | 24.49%      | 17.49%      | 12.49%      | 8.93%       | 8.92%       | 8.93%       | 4.46%       |
| Depreciation Charge      |           |            |            | 16,433,403  | 28,163,333  | 20,113,381  | 14,363,415  | 10,269,439  | 10,257,939  | 10,269,439  | 5,128,970   |
| Remaining Value          |           |            |            | 98,565,916  | 70,402,583  | 50,289,202  | 35,925,787  | 25,656,348  | 15,398,409  | 5,128,970   | 0           |
| Power and Steam Plant    |           |            |            |             |             |             |             |             |             |             |             |
| MACRS method (20yr)      |           |            |            | 3.75%       | 7.22%       | 6.68%       | 6.18%       | 5.71%       | 5.29%       | 4.89%       | 4.52%       |
| Depreciation Charge      |           |            |            | 634,733     | 1,221,904   | 1,130,164   | 1,045,533   | 966,995     | 894,551     | 827,354     | 765,404     |
| Remaining Value          |           |            |            | 16,291,486  | 15,069,583  | 13,939,419  | 12,893,886  | 11,926,891  | 11,032,341  | 10,204,987  | 9,439,583   |
| Remaining Value          |           |            |            | 114,857,403 | 85,472,166  | 64,228,621  | 48,819,674  | 37,583,240  | 26,430,750  | 15,333,957  | 9,439,583   |
| Net Revenue              |           |            |            | -1,728,411  | -4,224,581  | 4,389,206   | 10,733,664  | 15,456,828  | 16,135,475  | 16,833,451  | 22,729,531  |
| Losses Forward           |           |            |            |             |             | -5,952,992  | -1,563,786  | 0           | 0           | 0           | 0           |
| Taxable Income           |           |            |            | -1,728,411  | -5,952,992  | -1,563,786  | 9,169,878   | 15,456,828  | 16,135,475  | 16,833,451  | 22,729,531  |
| Income Tax               |           |            |            | 0           | 0           | 0           | 3,209,457   | 5,409,890   | 5,647,416   | 5,891,708   | 7,955,336   |
| Annual Cash Flow         |           |            |            | 9,875,673   | 19,259,481  | 19,259,481  | 16,050,023  | 13,849,591  | 13,612,064  | 13,367,773  | 11,304,145  |
| Discount Factor          | 1.3225    | 1.1500     | 1.0000     | 0.8696      | 0.7561      | 0.6575      | 0.5718      | 0.4972      | 0.4323      | 0.3759      | 0.3269      |
| Annual Present Value     |           |            |            | 8,587,542   | 14,562,934  | 12,663,421  | 9,176,653   | 6,885,694   | 5,884,871   | 5,025,441   | 3,695,345   |
| TPI + Interest           | 9,042,833 | 41,363,406 | 29,815,172 | 5,506,457   | 4,457,695   | 3,565,847   | 2,809,222   | 2,169,031   | 1,629,007   | 1,175,072   | 795,043     |
| NPV                      |           |            | 0          |             |             |             |             |             |             |             |             |

**Table S9.** Discounted cashflow sheet of THFDM production and THFDM-C18 diester production (part 2)

| Year                     | 9           | 10          | 11          | 12          | 13          | 14          | 15          | 16          | 17          | 18          | 19          |
|--------------------------|-------------|-------------|-------------|-------------|-------------|-------------|-------------|-------------|-------------|-------------|-------------|
| Capital Investment       |             |             |             |             |             |             |             |             |             |             |             |
| Land                     |             |             |             |             |             |             |             |             |             |             |             |
| Working Capital          |             |             |             |             |             |             |             |             |             |             |             |
| Loan payment             | 11,796,477  | 11,796,477  |             |             |             |             |             |             |             |             |             |
| Loan interest payment    | 1,682,899   | 873,813     |             |             |             |             |             |             |             |             |             |
| Loan principal           | 10,922,664  | 0           |             |             |             |             |             |             |             |             |             |
| THFDM-C18 diester        | 147,017,039 | 147,017,039 | 147,017,039 | 147,017,039 | 147,017,039 | 147,017,039 | 147,017,039 | 147,017,039 | 147,017,039 | 147,017,039 | 147,017,039 |
| Excess electricity       | 1,546,407   | 1,546,407   | 1,546,407   | 1,546,407   | 1,546,407   | 1,546,407   | 1,546,407   | 1,546,407   | 1,546,407   | 1,546,407   | 1,546,407   |
| Total Annual Sales       | 148,563,446 | 148,563,446 | 148,563,446 | 148,563,446 | 148,563,446 | 148,563,446 | 148,563,446 | 148,563,446 | 148,563,446 | 148,563,446 | 148,563,446 |
| Feed cost                | 35,531,342  | 35,531,342  | 35,531,342  | 35,531,342  | 35,531,342  | 35,531,342  | 35,531,342  | 35,531,342  | 35,531,342  | 35,531,342  | 35,531,342  |
| Variable Operating Costs | 75,923,287  | 75,923,287  | 75,923,287  | 75,923,287  | 75,923,287  | 75,923,287  | 75,923,287  | 75,923,287  | 75,923,287  | 75,923,287  | 75,923,287  |
| Fixed Operating Costs    | 6,052,859   | 6,052,859   | 6,052,859   | 6,052,859   | 6,052,859   | 6,052,859   | 6,052,859   | 6,052,859   | 6,052,859   | 6,052,859   | 6,052,859   |
| Total Product Cost       | 117,507,488 | 117,507,488 | 117,507,488 | 117,507,488 | 117,507,488 | 117,507,488 | 117,507,488 | 117,507,488 | 117,507,488 | 117,507,488 | 117,507,488 |
| Annual Depreciation      |             |             |             |             |             |             |             |             |             |             |             |
| General Plant            |             |             |             |             |             |             |             |             |             |             |             |
| MACRS method (7yr)       |             |             |             |             |             |             |             |             |             |             |             |
| Depreciation Charge      |             |             |             |             |             |             |             |             |             |             |             |
| Remaining Value          |             |             |             |             |             |             |             |             |             |             |             |
| Power and Steam Plant    |             |             |             |             |             |             |             |             |             |             |             |
| MACRS method (20yr)      | 4.46%       | 4.46%       | 4.46%       | 4.46%       | 4.46%       | 4.46%       | 4.46%       | 4.46%       | 4.46%       | 4.46%       | 4.46%       |
| Depreciation Charge      | 755,248     | 755,079     | 755,248     | 755,079     | 755,248     | 755,079     | 755,248     | 755,079     | 755,248     | 755,079     | 755,248     |
| Remaining Value          | 8,684,336   | 7,929,257   | 7,174,009   | 6,418,930   | 5,663,682   | 4,908,604   | 4,153,356   | 3,398,277   | 2,643,029   | 1,887,951   | 1,132,703   |
| Remaining Value          | 8,684,336   | 7,929,257   | 7,174,009   | 6,418,930   | 5,663,682   | 4,908,604   | 4,153,356   | 3,398,277   | 2,643,029   | 1,887,951   | 1,132,703   |
| Net Revenue              | 28,617,811  | 29,427,066  | 30,300,710  | 30,300,879  | 30,300,710  | 30,300,879  | 30,300,710  | 30,300,879  | 30,300,710  | 30,300,879  | 30,300,710  |
| Losses Forward           | 0           | 0           | 0           | 0           | 0           | 0           | 0           | 0           | 0           | 0           | 0           |
| Taxable Income           | 28,617,811  | 29,427,066  | 30,300,710  | 30,300,879  | 30,300,710  | 30,300,879  | 30,300,710  | 30,300,879  | 30,300,710  | 30,300,879  | 30,300,710  |
| Income Tax               | 10,016,234  | 10,299,473  | 10,605,249  | 10,605,308  | 10,605,249  | 10,605,308  | 10,605,249  | 10,605,308  | 10,605,249  | 10,605,308  | 10,605,249  |
| Annual Cash Flow         | 9,243,247   | 8,960,007   | 20,450,709  | 20,450,650  | 20,450,709  | 20,450,650  | 20,450,709  | 20,450,650  | 20,450,709  | 20,450,650  | 20,450,709  |
| Discount Factor          | 0.2843      | 0.2472      | 0.2149      | 0.1869      | 0.1625      | 0.1413      | 0.1229      | 0.1069      | 0.0929      | 0.0808      | 0.0703      |
| Annual Present Value     | 2,627,508   | 2,214,777   | 4,395,741   | 3,822,373   | 3,323,812   | 2,890,263   | 2,513,279   | 2,185,454   | 1,900,400   | 1,652,517   | 1,436,976   |
| TPI + Interest           | 478,385     | 215,993     | 0           | 0           | 0           | 0           | 0           | 0           | 0           | 0           | 0           |
| NPV                      |             |             |             |             |             |             |             |             |             |             |             |



**Table S10.** Discounted cashflow sheet of THFDM production and THFDM-C18 diester production (part 3)

| Year                     | 20          | 21          | 22          | 23          | 24          | 25          | 26          | 27          | 28          | 29          | 30          |
|--------------------------|-------------|-------------|-------------|-------------|-------------|-------------|-------------|-------------|-------------|-------------|-------------|
| Capital Investment       |             |             |             |             |             |             |             |             |             |             |             |
| Land                     |             |             |             |             |             |             |             |             |             |             | -2,109,469  |
| Working Capital          |             |             |             |             |             |             |             |             |             |             | -6,596,277  |
| Loan payment             |             |             |             |             |             |             |             |             |             |             |             |
| Loan interest payment    |             |             |             |             |             |             |             |             |             |             |             |
| Loan principal           |             |             |             |             |             |             |             |             |             |             |             |
| THFDM-C18 diester        | 147,017,039 | 147,017,039 | 147,017,039 | 147,017,039 | 147,017,039 | 147,017,039 | 147,017,039 | 147,017,039 | 147,017,039 | 147,017,039 | 147,017,039 |
| Excess electricity       | 1,546,407   | 1,546,407   | 1,546,407   | 1,546,407   | 1,546,407   | 1,546,407   | 1,546,407   | 1,546,407   | 1,546,407   | 1,546,407   | 1,546,407   |
| Total Annual Sales       | 148,563,446 | 148,563,446 | 148,563,446 | 148,563,446 | 148,563,446 | 148,563,446 | 148,563,446 | 148,563,446 | 148,563,446 | 148,563,446 | 148,563,446 |
| Feed cost                | 35,531,342  | 35,531,342  | 35,531,342  | 35,531,342  | 35,531,342  | 35,531,342  | 35,531,342  | 35,531,342  | 35,531,342  | 35,531,342  | 35,531,342  |
| Variable Operating Costs | 75,923,287  | 75,923,287  | 75,923,287  | 75,923,287  | 75,923,287  | 75,923,287  | 75,923,287  | 75,923,287  | 75,923,287  | 75,923,287  | 75,923,287  |
| Fixed Operating Costs    | 6,052,859   | 6,052,859   | 6,052,859   | 6,052,859   | 6,052,859   | 6,052,859   | 6,052,859   | 6,052,859   | 6,052,859   | 6,052,859   | 6,052,859   |
| Total Product Cost       | 117,507,488 | 117,507,488 | 117,507,488 | 117,507,488 | 117,507,488 | 117,507,488 | 117,507,488 | 117,507,488 | 117,507,488 | 117,507,488 | 117,507,488 |
| Annual Depreciation      |             |             |             |             |             |             |             |             |             |             |             |
| General Plant            |             |             |             |             |             |             |             |             |             |             |             |
| MACRS method (7yr)       |             |             |             |             |             |             |             |             |             |             |             |
| Depreciation Charge      |             |             |             |             |             |             |             |             |             |             |             |
| Remaining Value          |             |             |             |             |             |             |             |             |             |             |             |
| Power and Steam Plant    |             |             |             |             |             |             |             |             |             |             |             |
| MACRS method (20yr)      | 4.46%       | 2.23%       |             |             |             |             |             |             |             |             |             |
| Depreciation Charge      | 755,079     | 377,624     |             |             |             |             |             |             |             |             |             |
| Remaining Value          | 377,624     | 0           |             |             |             |             |             |             |             |             |             |
| Remaining Value          | 377,624     | 0           |             |             |             |             |             |             |             |             |             |
| Net Revenue              | 30,300,879  | 30,678,334  | 31,055,958  | 31,055,958  | 31,055,958  | 31,055,958  | 31,055,958  | 31,055,958  | 31,055,958  | 31,055,958  | 31,055,958  |
| Losses Forward           | 0           | 0           | 0           | 0           | 0           | 0           | 0           | 0           | 0           | 0           | 0           |
| Taxable Income           | 30,300,879  | 30,678,334  | 31,055,958  | 31,055,958  | 31,055,958  | 31,055,958  | 31,055,958  | 31,055,958  | 31,055,958  | 31,055,958  | 31,055,958  |
| Income Tax               | 10,605,308  | 10,737,417  | 10,869,585  | 10,869,585  | 10,869,585  | 10,869,585  | 10,869,585  | 10,869,585  | 10,869,585  | 10,869,585  | 10,869,585  |
| Annual Cash Flow         | 20,450,650  | 20,318,541  | 20,186,373  | 20,186,373  | 20,186,373  | 20,186,373  | 20,186,373  | 20,186,373  | 20,186,373  | 20,186,373  | 20,186,373  |
| Discount Factor          | 0.0611      | 0.0531      | 0.0462      | 0.0402      | 0.0349      | 0.0304      | 0.0264      | 0.0230      | 0.0200      | 0.0174      | 0.0151      |
| Annual Present Value     | 1,249,540   | 1,079,538   | 932,622     | 810,976     | 705,196     | 613,214     | 533,230     | 463,678     | 403,198     | 350,607     | 304,876     |
| TPI + Interest           | 0           | 0           | 0           | 0           | 0           | 0           | 0           | 0           | 0           | 0           | -131,483    |
| NPV                      |             |             |             |             |             |             |             |             |             |             |             |

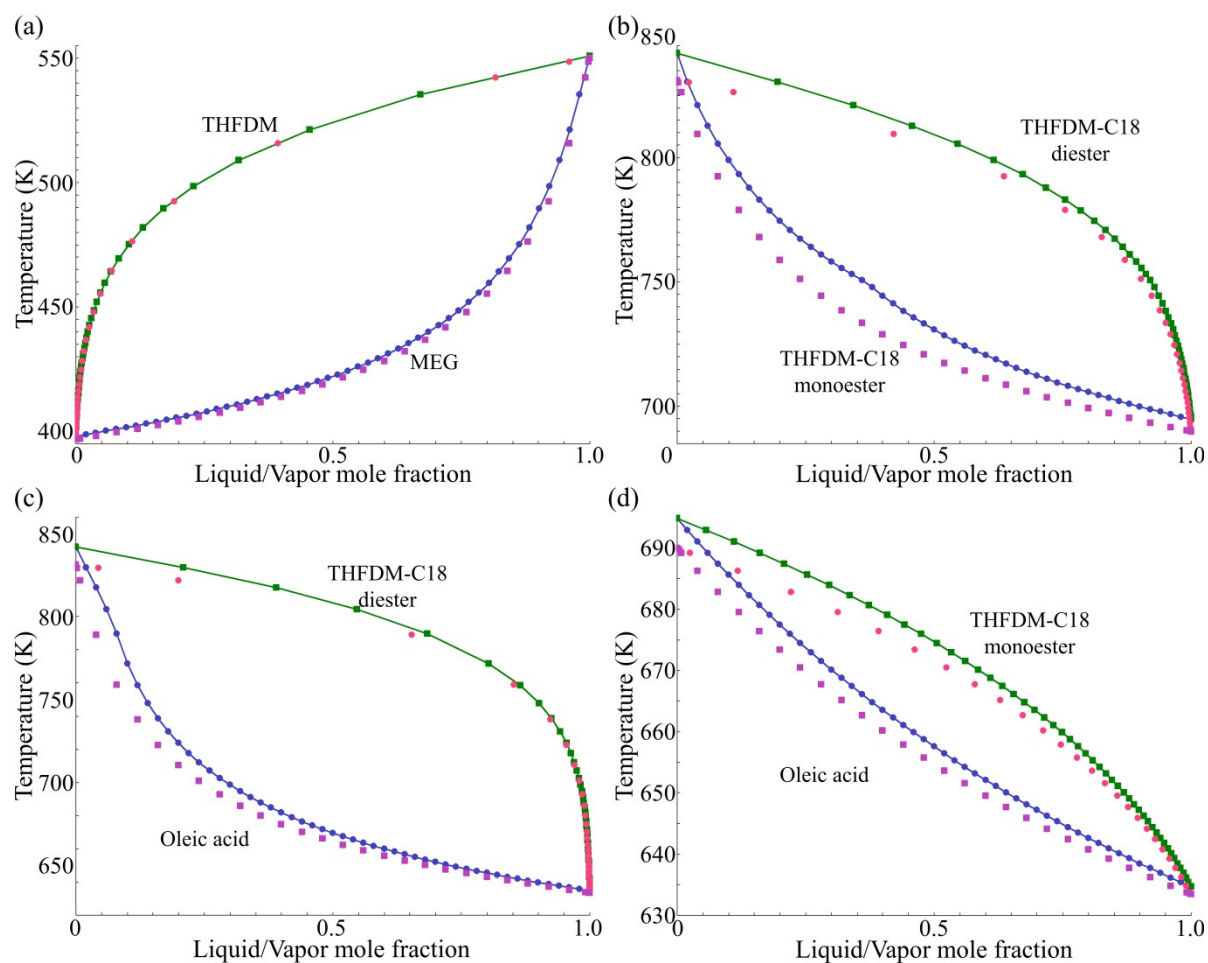

**Figure S38.** T-xy diagrams for the calculated VLE data (dot) and fitting VLE data (line) of the binary system. (a) THFDM and MEG, (b) THFDM-C18 monoester and THFDM-C18 diester, (c) Oleic acid and THFDM-C18 diester, and (d) Oleic acid and THFDM-C18 monoester.

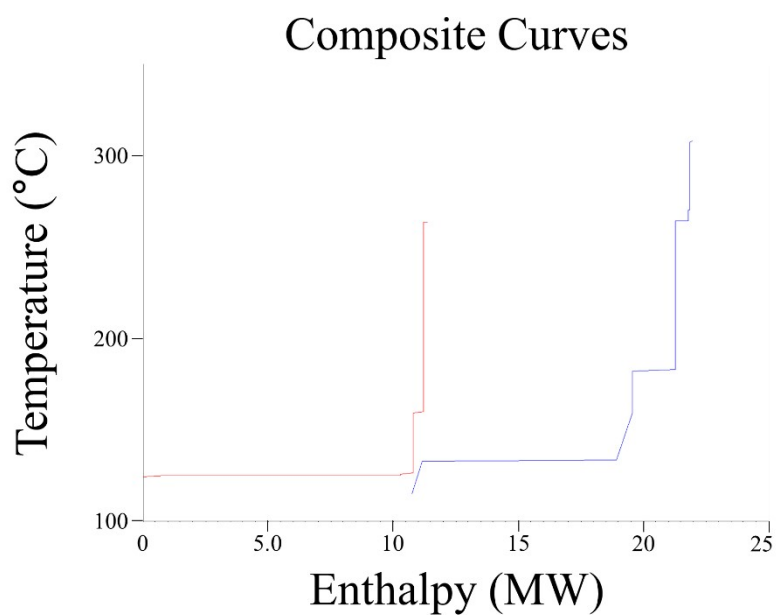

**Figure S39.** Composite curve of HMF hydrogenation and THFDM purification using Aspen Energy Analyzer

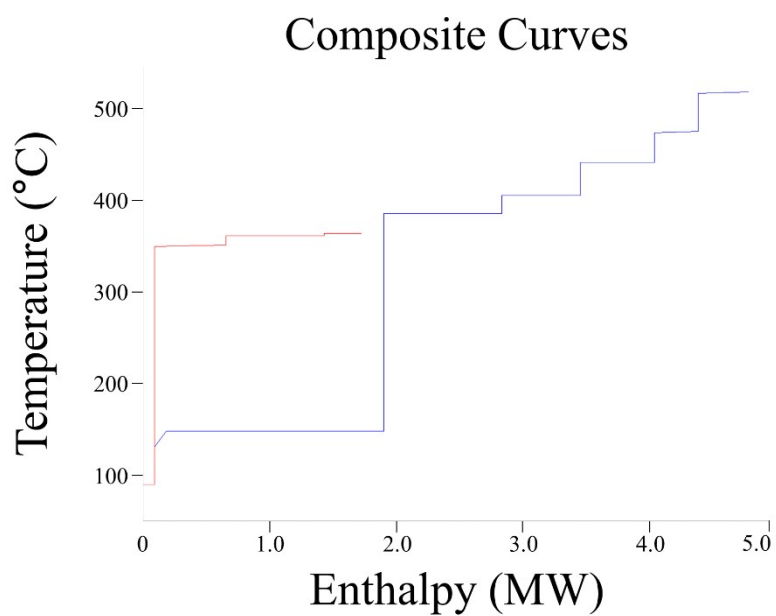

**Figure S40.** Composite curve of THFDM esterification and THFDM-C18 diester purification using Aspen Energy Analyzer

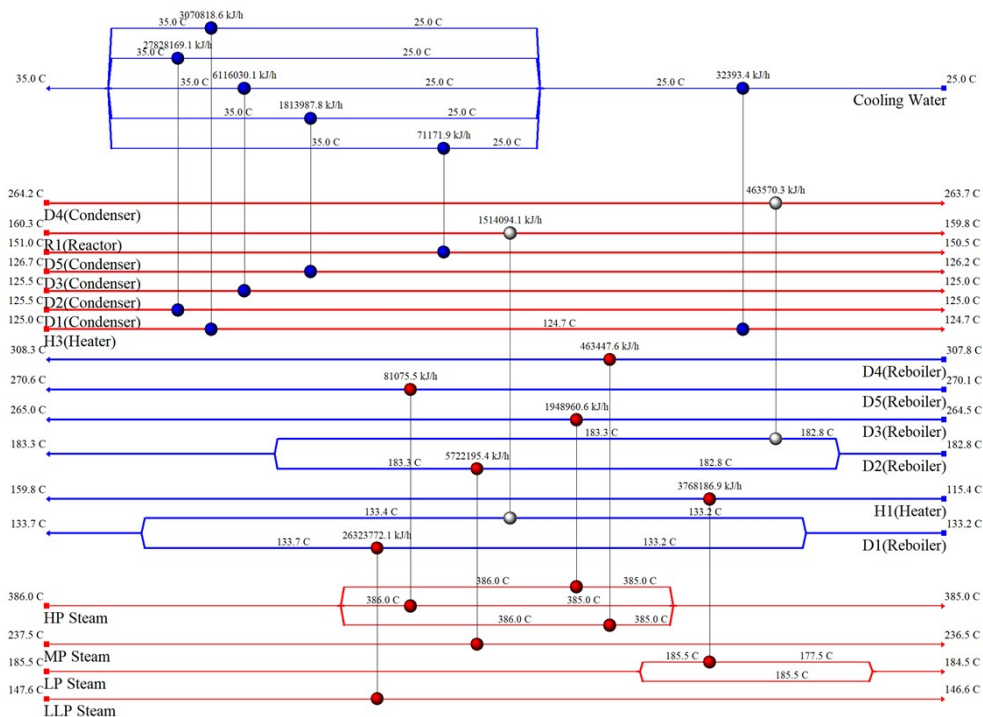

**Figure S41.** The suggested heat exchanger network for HMF hydrogenation and THFDM purification process, obtained using Aspen Energy Analyzer (minimum temperature difference,  $\Delta T_{min}$  is 10 K).

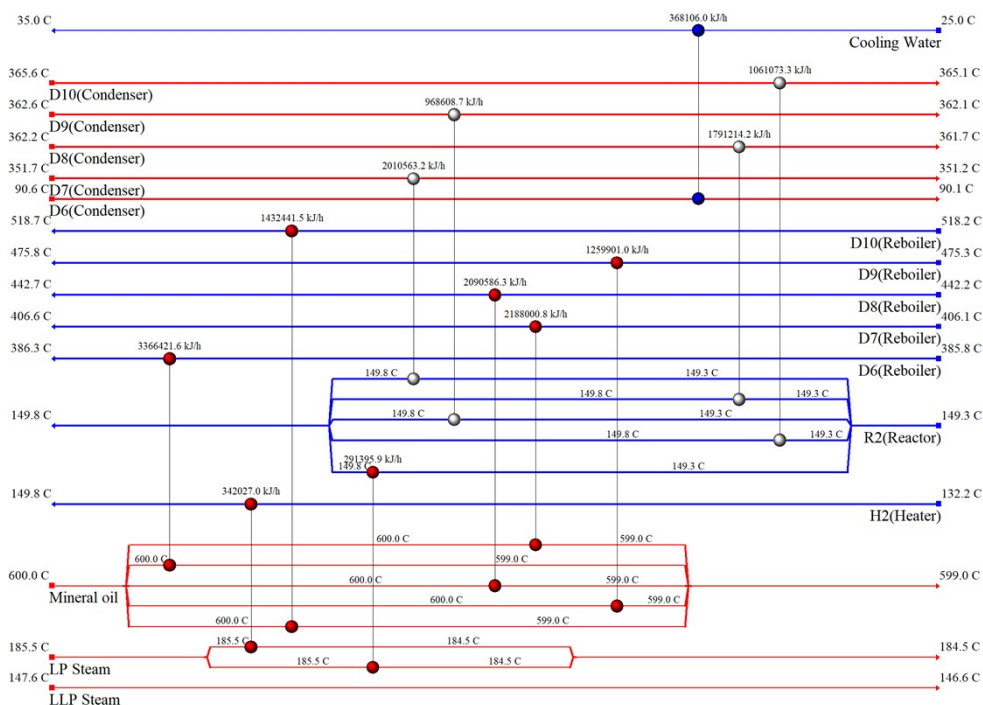

**Figure S42.** The suggested heat exchanger network for THFDM esterification and THFDM-C18 diester purification process, obtained using Aspen Energy Analyzer (minimum temperature difference,  $\Delta T_{min}$  is 10 K).

$\Delta T_{\min}$  is 10 K).

### **Reference**

1. S. Prahlada Rao and S. Sunkada, *Resonance*, 2007, **12**, 43-57.
